# Supplementary material for: Pervasive Hitchhiking at Coding and Regulatory Sites in Humans
Source: PubMed Central journal article supplement (PMC2613029; doi:10.1371/journal.pgen.1000336), 2009-01-16

Figure S1. Correlations between recombination rate and neutral divergence rate and neutral polymorphism. Scatter plots display values of two variables in gray dots for **(a)** recombination rate (RR) and the level of neutral divergence rate ( $d_{neu}$ ), **(b)** recombination rate (RR) and the level of neutral polymorphism ( $\theta_{neu}$ ), and **(c)** recombination rate (RR) and the level of normalized neutral polymorphism ( $P_{neu} = \theta_{neu}/d_{neu}$ ). Red circles are average values for the pooled gray dots in 100 bins each containing 1% of the data points. The solid green line shows the fit of a linear model. Spearman's correlation coefficients for **(a)** to **(c)** are 0.302, 0.316, and 0.210, respectively. These coefficients are significantly different from zero ( $P < 0.001$ ). The values of  $\theta_{neu}$  and  $P_{neu}$  here are based on the Watson data. The results derived from the Perlegen data are given in Fig. 1.

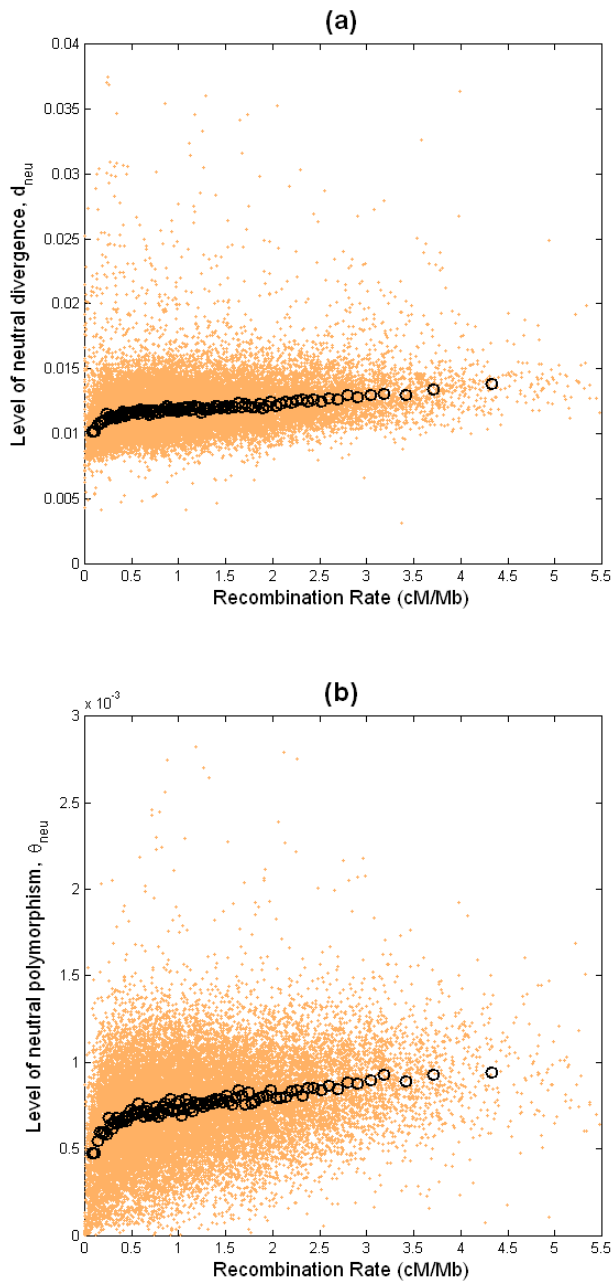

(c)

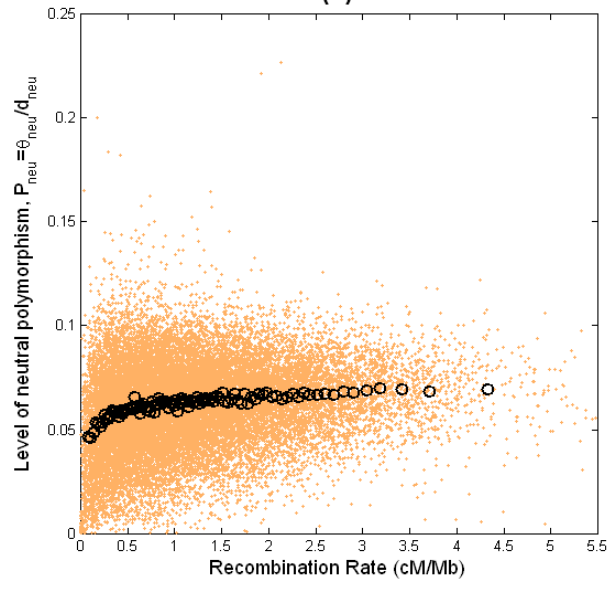

Supplement: pgen.1000336.s001.pdf [file pgen.1000336.s001.pdf]
