# Supplementary material for: Pervasive Hitchhiking at Coding and Regulatory Sites in Humans
Source: PubMed Central journal article supplement (PMC2613029; doi:10.1371/journal.pgen.1000336), 2009-01-16

Fig S3. Relationships among the levels of functional density [i.e. the number of codons ( $FD_n$ ) or the number of conserved noncoding sites ( $FD_x$ )] and neutral polymorphism [i.e. the level of neutral polymorphism ( $\theta_{neu}$ ) or the level of normalized neutral polymorphism ( $P_{neu} = \theta_{neu}/d_{neu}$ )]. Scatter plots display values of two variables in gray dots for **(a)**  $FD_n$  and  $\theta_{neu}$ , **(b)**  $FD_x$  and  $\theta_{neu}$ , **(c)**  $FD_n$  and  $P_{neu}$ , and **(d)**  $FD_x$  and  $P_{neu}$ . Red circles are average values for the pooled gray dots in 100 bins each containing 1% of the data points. The solid, green line shows the fit of a linear model. The values of  $\theta_{neu}$  and  $P_{neu}$  here are based on the Watson data. The results derived from the Perlegen data are given in Fig. 2.

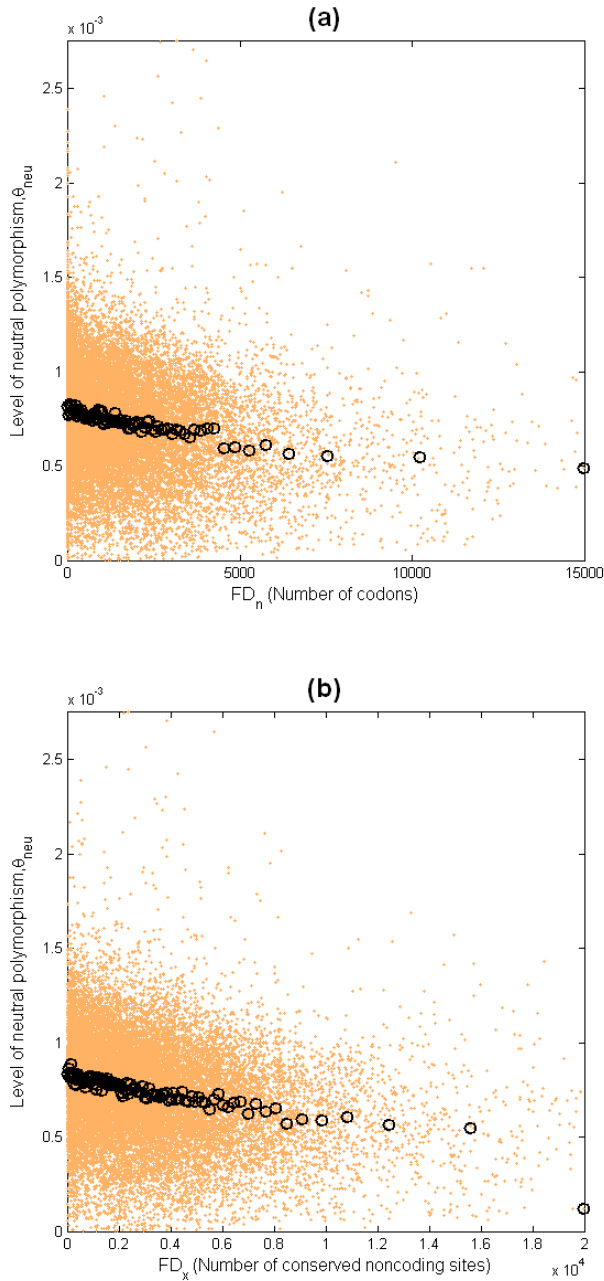

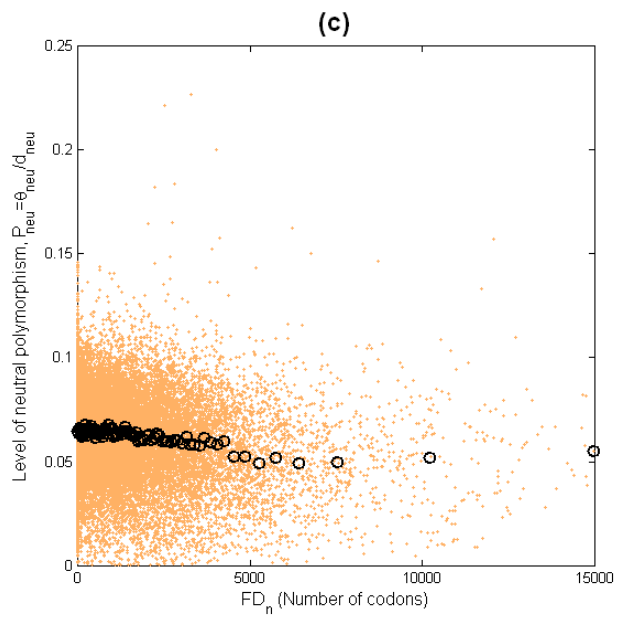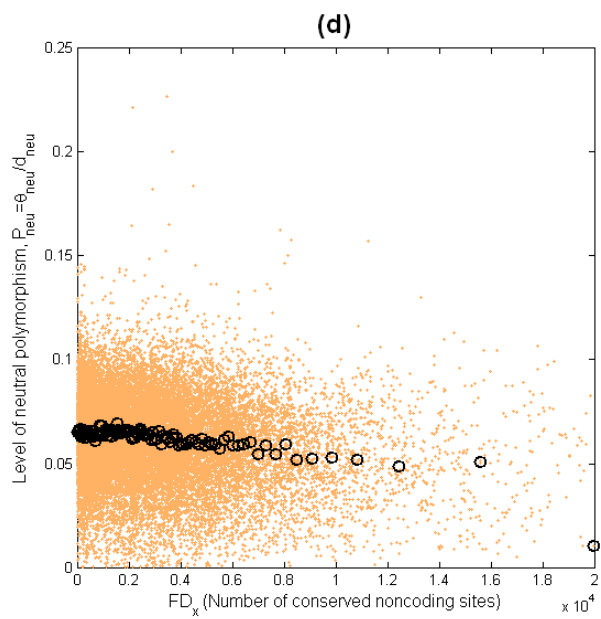

Supplement: pgen.1000336.s003.pdf [file pgen.1000336.s003.pdf]
