# Supplementary material for: Pervasive Hitchhiking at Coding and Regulatory Sites in Humans
Source: PubMed Central journal article supplement (PMC2613029; doi:10.1371/journal.pgen.1000336), 2009-01-16

Figure S6. Residual-residual plots between functional divergence [i.e. the divergence at coding sites ( $D_n$ ) or the divergence at conserved noncoding region ( $D_x$ )] and neutral polymorphism [i.e. the level of neutral polymorphism ( $\theta_{neu}$ ) and the level of normalized neutral polymorphism ( $P_{neu} = \theta_{neu}/d_{neu}$ )], after both have been adjusted for effects of GC content (GC), repeat density (RD), functional constraints [i.e. the number of codons ( $FD_n$ ) and the number of conserved noncoding sites ( $FD_x$ )], and functional divergence ( $D_n$  or  $D_x$ , excluding the response variable under test).  $e(Y|X)$  is the difference between the observed value of the response variable, Y, and the value suggested by the regression model of Y on several predictor variables  $X = \{GC, RD, D_n, D_x, FD_n, FD_x\}$ . The values of  $\theta_{neu}$  and  $P_{neu}$  here are based on the Perlegen data are in **(a)** and based on the Watson data are in **(b)**.

**(a)**

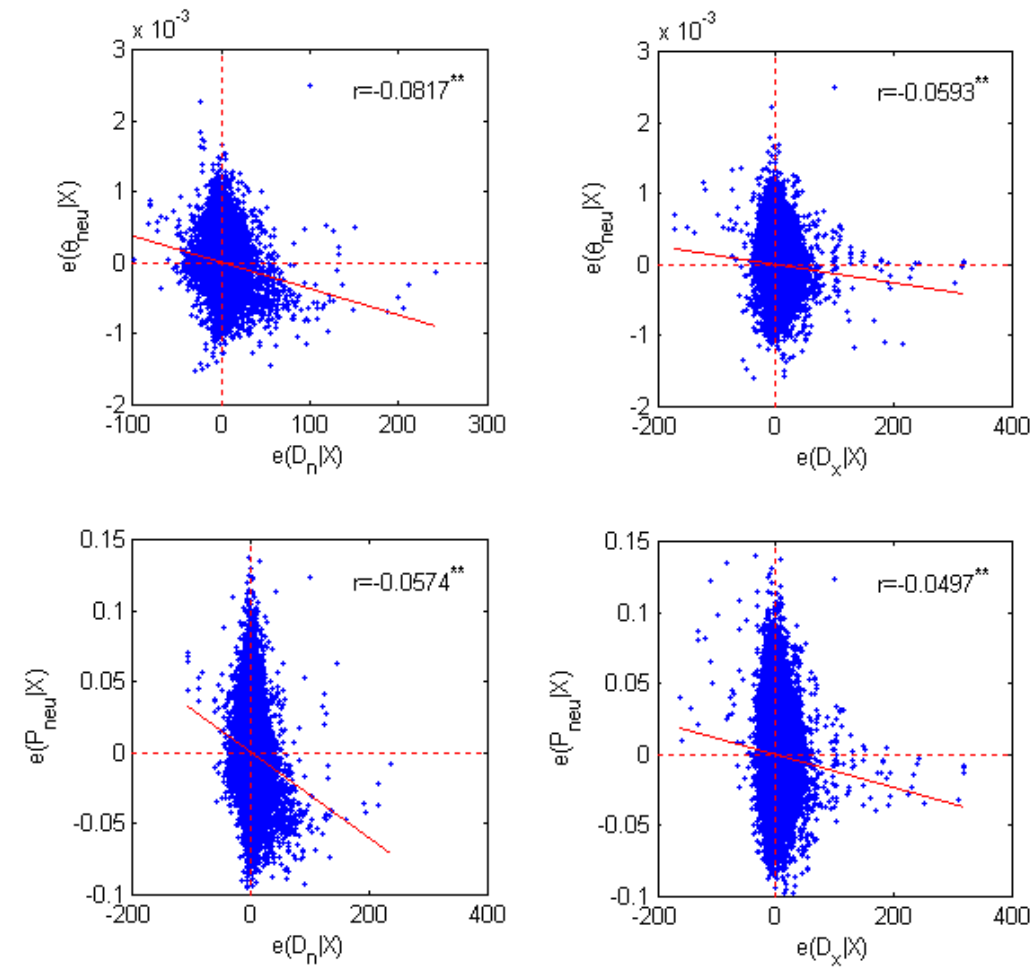

**(b)**

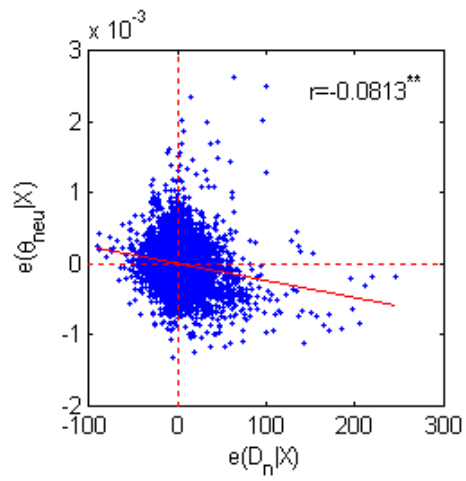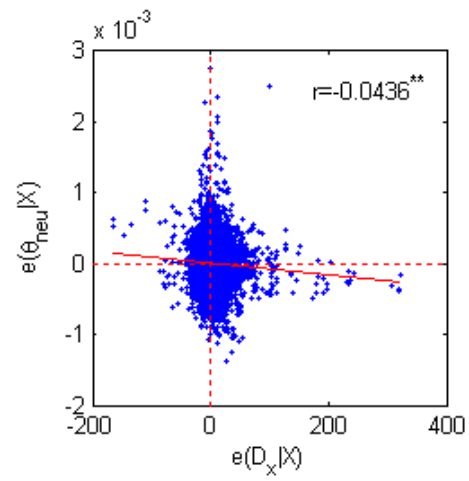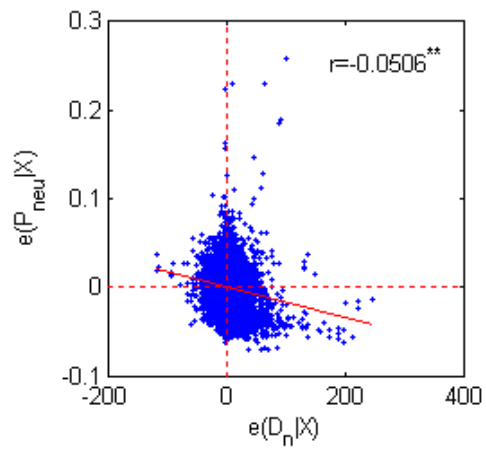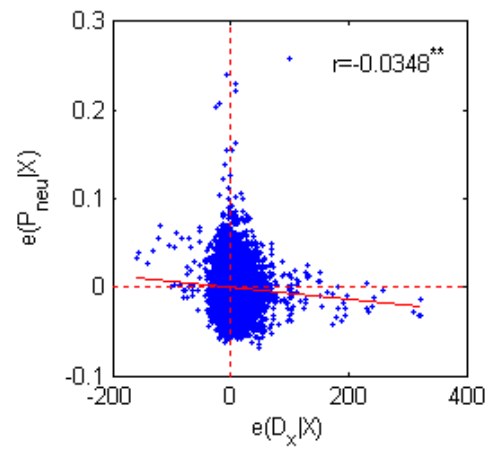

Supplement: pgen.1000336.s006.pdf [file pgen.1000336.s006.pdf]
