# Supplementary material for: Pervasive Hitchhiking at Coding and Regulatory Sites in Humans
Source: PubMed Central journal article supplement (PMC2613029; doi:10.1371/journal.pgen.1000336), 2009-01-16

Figure S10. Results derived from the sliding windows of 600 kb. Correlations between functional density [i.e. the number of codons ( $FD_n$ ) or the number of conserved noncoding sites ( $FD_x$ )], and divergence [i.e. the divergence at coding sites ( $D_n$ ) or the divergence at conserved noncoding region ( $D_x$ )] and neutral polymorphism [i.e. the level of neutral polymorphism ( $\theta_{neu}$ ) and the level of normalized neutral polymorphism ( $P_{neu} = \theta_{neu}/d_{neu}$ )] are given. The results are based on the Watson data.

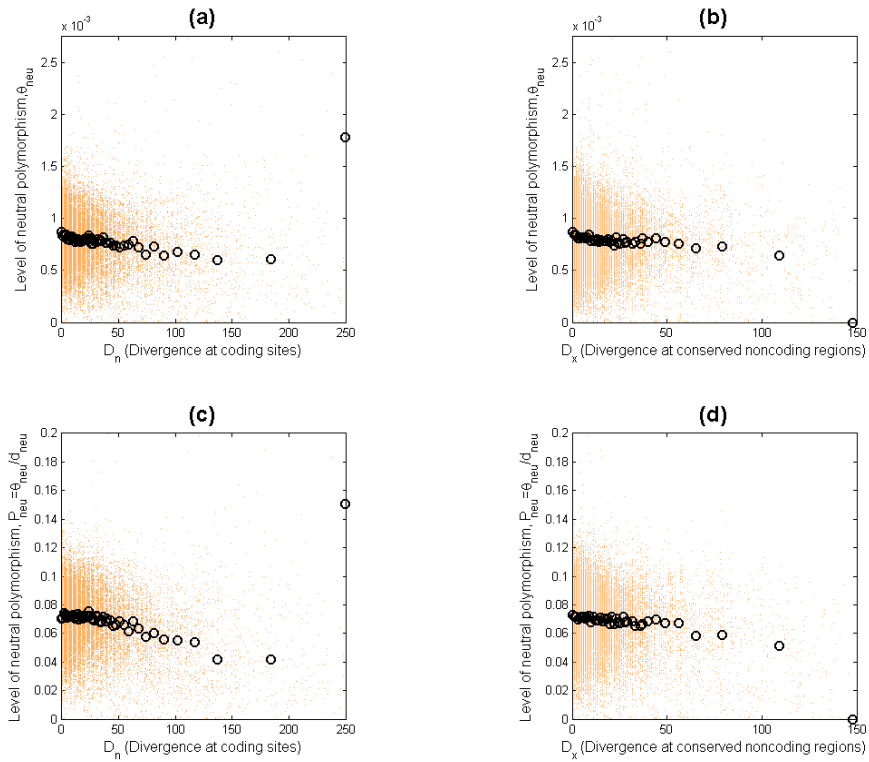

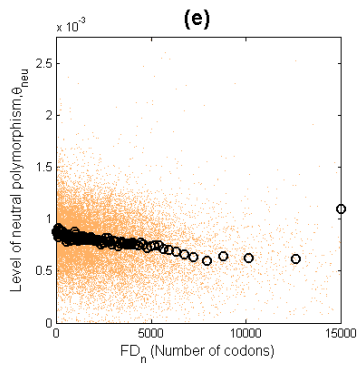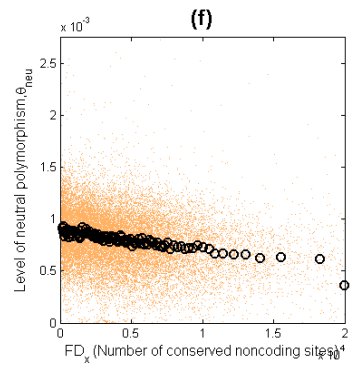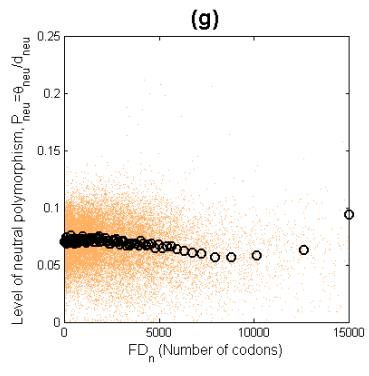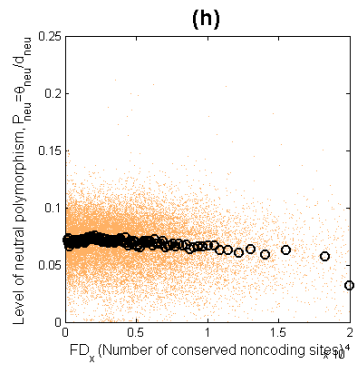

Supplement: pgen.1000336.s010.pdf [file pgen.1000336.s010.pdf]
