# Supplementary material for: Pervasive Hitchhiking at Coding and Regulatory Sites in Humans
Source: PubMed Central journal article supplement (PMC2613029; doi:10.1371/journal.pgen.1000336), 2009-01-16
Supplement: pgen.1000336.s011.pdf [file pgen.1000336.s011.pdf]

Table S1. Correlation coefficients among the studied variables: the level of neutral polymorphism ( $\theta_{neu}$ ), the level of normalized neutral polymorphism ( $P_{neu}=\theta_{neu}/d_{neu}$ ), recombination rate (RR), GC content (GC), the density of simple repeats (RD), the depth of sequencing coverage (SC), the divergence at coding sites ( $D_n$ ), the divergence at conserved noncoding region ( $D_x$ ), the number of codons ( $FD_n$ ), the number of conserved noncoding sites ( $FD_x$ ), and the level of neutral divergence ( $d_{neu}$ ). Spearman's  $\rho$  and Kendall's  $\tau$  are given at the upper and lower diagonal parts of the table, respectively. The values of  $\theta_{neu}$  and  $P_{neu}$  are based on the Watson data.

|                | $\theta_{neu}$ | $P_{neu}$           | RR        | GC        | RD                  | SC                  | $D_n$     | $D_x$     | $FD_n$              | $FD_x$    | $d_{neu}$           |
|----------------|----------------|---------------------|-----------|-----------|---------------------|---------------------|-----------|-----------|---------------------|-----------|---------------------|
| $\theta_{neu}$ | —              | 0.9007**            | 0.3155**  | -0.0875** | -0.0775**           | 0.1183**            | -0.1855** | -0.1143** | -0.2247**           | -0.2403** | 0.3663**            |
| $P_{neu}$      | 0.7361**       | —                   | 0.2098**  | -0.0514** | -0.1086**           | 0.1364**            | -0.1363** | -0.1075** | -0.1290**           | -0.1384** | -0.0122<br>(0.0631) |
| RR             | 0.2149**       | 0.1412**            | —         | 0.3432**  | -0.2738**           | 0.0819**            | 0.0373**  | -0.0519** | 0.0189*             | -0.0315** | 0.3024**            |
| GC             | -0.0586**      | -0.0342**           | 0.2351**  | —         | -0.0554**           | -0.4729**           | 0.5789**  | 0.1934**  | 0.6192**            | 0.5183**  | -0.1069**           |
| RD             | -0.0520**      | -0.0730**           | -0.1856** | -0.0370** | —                   | -0.4839**           | 0.0300**  | 0.0622**  | -0.0147<br>(0.0256) | -0.0265** | 0.0415**            |
| SC             | 0.0787**       | 0.0912**            | 0.0564**  | -0.3175** | -0.3415**           | —                   | -0.4579** | -0.2683** | -0.4321**           | -0.3821** | -0.0159<br>(0.0155) |
| $D_n$          | -0.1304**      | -0.0950**           | 0.0263**  | 0.4218**  | 0.0217**            | -0.3279**           | —         | 0.3078**  | 0.8964**            | 0.6824**  | -0.1550**           |
| $D_x$          | -0.0790**      | -0.0742**           | -0.0358** | 0.1319**  | 0.0429**            | -0.1867**           | 0.2239**  | —         | 0.3028**            | 0.4962**  | -0.0260**           |
| $FD_n$         | -0.1540**      | -0.0872**           | 0.0136*   | 0.4479**  | -0.0095<br>(0.0329) | -0.2968**           | 0.7411**  | 0.2131**  | —                   | 0.8283**  | -0.2748**           |
| $FD_x$         | -0.1617**      | -0.0921**           | -0.0205** | 0.3610**  | -0.0179**           | -0.2587**           | 0.5099**  | 0.3519**  | 0.6533**            | —         | -0.2926**           |
| $d_{neu}$      | 0.2553**       | -0.0087<br>(0.0478) | 0.2075**  | -0.0734** | 0.0280**            | -0.0099<br>(0.0242) | -0.1124** | -0.0188** | -0.1903**           | -0.1990** | —                   |

\*\* Correlation is significant at the 0.001 level (2-tailed).

\* Correlation is significant at the 0.01 level (2-tailed).
