# Supplementary material for: Pervasive Hitchhiking at Coding and Regulatory Sites in Humans
Source: PubMed Central journal article supplement (PMC2613029; doi:10.1371/journal.pgen.1000336), 2009-01-16
Supplement: pgen.1000336.s012.pdf [file pgen.1000336.s012.pdf]

Table S2. Correlation coefficients and partials correlation coefficients between recombination rate (RR) and levels of neutral polymorphism [i.e. the level of neutral polymorphism ( $\theta_{neu}$ ) and the level of normalized neutral polymorphism ( $P_{neu}=\theta_{neu}/d_{neu}$ )]. Spearman's partial correlation coefficients were calculated by controlling for all possible combinations of potentially confounding variables. The results of representative combinations are given here. Closed circles (●) indicate the controlled variables. These variables are GC content (GC), the density of simple repeats (RD), the divergence at coding sites ( $D_n$ ), the divergence at conserved noncoding region ( $D_x$ ), the number of codons ( $FD_n$ ), the number of conserved noncoding sites ( $FD_x$ ), and the level of neutral divergence rate ( $d_{neu}$ ). Open circles (○) indicate the variables that were not controlled in a particular analysis. (P) indicates the results are based on the Perlegen data, (W) indicates the results are based on the Watson data. *P*-values are given in parentheses.

| <b>RR and <math>\theta_{neu}</math> (and <math>P_{neu}</math>)</b> |                      |                           |                      |    |    |       |       |        |        |           |
|--------------------------------------------------------------------|----------------------|---------------------------|----------------------|----|----|-------|-------|--------|--------|-----------|
| RR and $\theta_{neu}$ (P)                                          | RR and $P_{neu}$ (P) | RR and $\theta_{neu}$ (W) | RR and $P_{neu}$ (W) | GC | RD | $D_n$ | $D_x$ | $FD_n$ | $FD_x$ | $d_{neu}$ |
| 0.2187*** (0)                                                      | 0.1309*** (0)        | 0.3155*** (0)             | 0.2098*** (0)        | ○  | ○  | ○     | ○     | ○      | ○      | ○         |
| 0.3511*** (0)                                                      | 0.2403*** (0)        | 0.3693*** (0)             | 0.2424*** (0)        | ●  | ○  | ○     | ○     | ○      | ○      | ○         |
| 0.1986*** (0)                                                      | 0.0995*** (0)        | 0.3068*** (0)             | 0.1883*** (0)        | ○  | ●  | ○     | ○     | ○      | ○      | ○         |
| 0.2439*** (0)                                                      | 0.1475*** (0)        | 0.3283*** (0)             | 0.2170*** (0)        | ○  | ○  | ●     | ○     | ○      | ○      | ○         |
| 0.2144*** (0)                                                      | 0.1255*** (0)        | 0.3120*** (0)             | 0.2056*** (0)        | ○  | ○  | ○     | ●     | ○      | ○      | ○         |
| 0.2401*** (0)                                                      | 0.1413*** (0)        | 0.3281*** (0)             | 0.2140*** (0)        | ○  | ○  | ○     | ○     | ●      | ○      | ○         |
| 0.2222*** (0)                                                      | 0.1288*** (0)        | 0.3173*** (0)             | 0.2075*** (0)        | ○  | ○  | ○     | ○     | ○      | ●      | ○         |
| 0.1469*** (0)                                                      | 0.1421*** (0)        | 0.2308*** (0)             | 0.2240*** (0)        | ○  | ○  | ○     | ○     | ○      | ○      | ●         |
| 0.3317*** (0)                                                      | 0.2094*** (0)        | 0.3616*** (0)             | 0.2217*** (0)        | ●  | ●  | ○     | ○     | ○      | ○      | ○         |
| 0.3279*** (0)                                                      | 0.2200*** (0)        | 0.3468*** (0)             | 0.2217*** (0)        | ●  | ○  | ●     | ○     | ○      | ○      | ○         |
| 0.3414*** (0)                                                      | 0.2295*** (0)        | 0.3612*** (0)             | 0.2327*** (0)        | ●  | ○  | ○     | ●     | ○      | ○      | ○         |
| 0.3165*** (0)                                                      | 0.2203*** (0)        | 0.3314*** (0)             | 0.2192*** (0)        | ●  | ○  | ○     | ○     | ●      | ○      | ○         |
| 0.3159*** (0)                                                      | 0.2212*** (0)        | 0.3294*** (0)             | 0.2176*** (0)        | ●  | ○  | ○     | ○     | ○      | ●      | ○         |
| 0.2838*** (0)                                                      | 0.2788*** (0)        | 0.2743*** (0)             | 0.2672*** (0)        | ●  | ○  | ○     | ○     | ○      | ○      | ●         |
| 0.2254*** (0)                                                      | 0.1171*** (0)        | 0.3214*** (0)             | 0.1966*** (0)        | ○  | ●  | ●     | ○     | ○      | ○      | ○         |
| 0.1965*** (0)                                                      | 0.0962*** (0)        | 0.3049*** (0)             | 0.1857*** (0)        | ○  | ●  | ○     | ●     | ○      | ○      | ○         |
| 0.2172*** (0)                                                      | 0.1077*** (0)        | 0.3187*** (0)             | 0.1920*** (0)        | ○  | ●  | ○     | ○     | ●      | ○      | ○         |
| 0.1975*** (0)                                                      | 0.0940*** (0)        | 0.3065*** (0)             | 0.1846*** (0)        | ○  | ●  | ○     | ○     | ○      | ●      | ○         |
| 0.1149*** (0)                                                      | 0.1083*** (0)        | 0.2116*** (0)             | 0.2019*** (0)        | ○  | ●  | ○     | ○     | ○      | ○      | ●         |
| 0.2399*** (0)                                                      | 0.1428*** (0)        | 0.3255*** (0)             | 0.2134*** (0)        | ○  | ○  | ●     | ●     | ○      | ○      | ○         |
| 0.2413*** (0)                                                      | 0.1464*** (0)        | 0.3270*** (0)             | 0.2166*** (0)        | ○  | ○  | ●     | ○     | ●      | ○      | ○         |
| 0.2354*** (0)                                                      | 0.1429*** (0)        | 0.3210*** (0)             | 0.2132*** (0)        | ○  | ○  | ●     | ○     | ○      | ●      | ○         |
| 0.1812*** (0)                                                      | 0.1753*** (0)        | 0.2467*** (0)             | 0.2398*** (0)        | ○  | ○  | ●     | ○     | ○      | ○      | ●         |
| 0.2369*** (0)                                                      | 0.1370*** (0)        | 0.3261*** (0)             | 0.2106*** (0)        | ○  | ○  | ○     | ●     | ●      | ○      | ○         |

|               |               |               |               |   |   |   |   |   |   |   |
|---------------|---------------|---------------|---------------|---|---|---|---|---|---|---|
| 0.2218*** (0) | 0.1269*** (0) | 0.3179*** (0) | 0.2060*** (0) | ○ | ○ | ○ | ● | ○ | ● | ○ |
| 0.1435*** (0) | 0.1385*** (0) | 0.2273*** (0) | 0.2205*** (0) | ○ | ○ | ○ | ● | ○ | ○ | ● |
| 0.2349*** (0) | 0.1387*** (0) | 0.3225*** (0) | 0.2103*** (0) | ○ | ○ | ○ | ○ | ● | ● | ○ |
| 0.1872*** (0) | 0.1814*** (0) | 0.2502*** (0) | 0.2431*** (0) | ○ | ○ | ○ | ○ | ● | ○ | ● |
| 0.1711*** (0) | 0.1655*** (0) | 0.2433*** (0) | 0.2363*** (0) | ○ | ○ | ○ | ○ | ○ | ● | ● |
| 0.3102*** (0) | 0.1908*** (0) | 0.3408*** (0) | 0.2028*** (0) | ● | ● | ● | ○ | ○ | ○ | ○ |
| 0.3237*** (0) | 0.2005*** (0) | 0.3548*** (0) | 0.2136*** (0) | ● | ● | ○ | ● | ○ | ○ | ○ |
| 0.2954*** (0) | 0.1881*** (0) | 0.3230*** (0) | 0.1979*** (0) | ● | ● | ○ | ○ | ● | ○ | ○ |
| 0.2934*** (0) | 0.1878*** (0) | 0.3197*** (0) | 0.1951*** (0) | ● | ● | ○ | ○ | ○ | ● | ○ |
| 0.2540*** (0) | 0.2474*** (0) | 0.2565*** (0) | 0.2465*** (0) | ● | ● | ○ | ○ | ○ | ○ | ● |
| 0.3236*** (0) | 0.2148*** (0) | 0.3436*** (0) | 0.2172*** (0) | ● | ○ | ● | ● | ○ | ○ | ○ |
| 0.3169*** (0) | 0.2230*** (0) | 0.3310*** (0) | 0.2205*** (0) | ● | ○ | ● | ○ | ● | ○ | ○ |
| 0.3121*** (0) | 0.2160*** (0) | 0.3268*** (0) | 0.2129*** (0) | ● | ○ | ● | ○ | ○ | ● | ○ |
| 0.2654*** (0) | 0.2614*** (0) | 0.2563*** (0) | 0.2491*** (0) | ● | ○ | ● | ○ | ○ | ○ | ● |
| 0.3131*** (0) | 0.2157*** (0) | 0.3290*** (0) | 0.2152*** (0) | ● | ○ | ○ | ● | ● | ○ | ○ |
| 0.3160*** (0) | 0.2215*** (0) | 0.3295*** (0) | 0.2176*** (0) | ● | ○ | ○ | ● | ○ | ● | ○ |
| 0.2731*** (0) | 0.2684*** (0) | 0.2640*** (0) | 0.2573*** (0) | ● | ○ | ○ | ● | ○ | ○ | ● |
| 0.3111*** (0) | 0.2179*** (0) | 0.3247*** (0) | 0.2150*** (0) | ● | ○ | ○ | ○ | ● | ● | ○ |
| 0.2668*** (0) | 0.2624*** (0) | 0.2561*** (0) | 0.2490*** (0) | ● | ○ | ○ | ○ | ● | ○ | ● |
| 0.2677*** (0) | 0.2634*** (0) | 0.2555*** (0) | 0.2484*** (0) | ● | ○ | ○ | ○ | ○ | ● | ● |
| 0.2225*** (0) | 0.1137*** (0) | 0.3193*** (0) | 0.1939*** (0) | ○ | ● | ● | ● | ○ | ○ | ○ |
| 0.2183*** (0) | 0.1142*** (0) | 0.3165*** (0) | 0.1955*** (0) | ○ | ● | ● | ○ | ● | ○ | ○ |
| 0.2127*** (0) | 0.1101*** (0) | 0.3108*** (0) | 0.1911*** (0) | ○ | ● | ● | ○ | ○ | ● | ○ |
| 0.1521*** (0) | 0.1443*** (0) | 0.2295*** (0) | 0.2196*** (0) | ○ | ● | ● | ○ | ○ | ○ | ● |
| 0.2153*** (0) | 0.1050*** (0) | 0.3174*** (0) | 0.1898*** (0) | ○ | ● | ○ | ● | ● | ○ | ○ |
| 0.1975*** (0) | 0.0935*** (0) | 0.3068*** (0) | 0.1841*** (0) | ○ | ● | ○ | ● | ○ | ● | ○ |
| 0.1139*** (0) | 0.1073*** (0) | 0.2098*** (0) | 0.2001*** (0) | ○ | ● | ○ | ● | ○ | ○ | ● |
| 0.2108*** (0) | 0.1043*** (0) | 0.3120*** (0) | 0.1875*** (0) | ○ | ● | ○ | ○ | ● | ● | ○ |
| 0.1553*** (0) | 0.1479*** (0) | 0.2315*** (0) | 0.2216*** (0) | ○ | ● | ○ | ○ | ● | ○ | ● |
| 0.1379*** (0) | 0.1306*** (0) | 0.2238*** (0) | 0.2139*** (0) | ○ | ● | ○ | ○ | ○ | ● | ● |
| 0.2379*** (0) | 0.1420*** (0) | 0.3247*** (0) | 0.2131*** (0) | ○ | ○ | ● | ● | ● | ○ | ○ |
| 0.2348*** (0) | 0.1411*** (0) | 0.3214*** (0) | 0.2118*** (0) | ○ | ○ | ● | ● | ○ | ● | ○ |
| 0.1762*** (0) | 0.1704*** (0) | 0.2423*** (0) | 0.2357*** (0) | ○ | ○ | ● | ● | ○ | ○ | ● |
| 0.2365*** (0) | 0.1427*** (0) | 0.3223*** (0) | 0.2125*** (0) | ○ | ○ | ● | ○ | ● | ● | ○ |
| 0.1863*** (0) | 0.1806*** (0) | 0.2495*** (0) | 0.2424*** (0) | ○ | ○ | ● | ○ | ● | ○ | ● |

|               |               |               |               |   |   |   |   |   |   |   |
|---------------|---------------|---------------|---------------|---|---|---|---|---|---|---|
| 0.1831*** (0) | 0.1770*** (0) | 0.2476*** (0) | 0.2407*** (0) | ○ | ○ | ● | ○ | ○ | ● | ● |
| 0.2343*** (0) | 0.1375*** (0) | 0.3225*** (0) | 0.2094*** (0) | ○ | ○ | ○ | ● | ● | ● | ○ |
| 0.1816*** (0) | 0.1760*** (0) | 0.2454*** (0) | 0.2386*** (0) | ○ | ○ | ○ | ● | ● | ○ | ● |
| 0.1680*** (0) | 0.1625*** (0) | 0.2407*** (0) | 0.2340*** (0) | ○ | ○ | ○ | ● | ○ | ● | ● |
| 0.1853*** (0) | 0.1797*** (0) | 0.2479*** (0) | 0.2408*** (0) | ○ | ○ | ○ | ○ | ● | ● | ● |
| 0.3068*** (0) | 0.1867*** (0) | 0.3382*** (0) | 0.1993*** (0) | ● | ● | ● | ● | ○ | ○ | ○ |
| 0.2957*** (0) | 0.1922*** (0) | 0.3216*** (0) | 0.2002*** (0) | ● | ● | ● | ○ | ● | ○ | ○ |
| 0.2910*** (0) | 0.1846*** (0) | 0.3180*** (0) | 0.1920*** (0) | ● | ● | ● | ○ | ○ | ● | ○ |
| 0.2378*** (0) | 0.2320*** (0) | 0.2406*** (0) | 0.2305*** (0) | ● | ● | ● | ○ | ○ | ○ | ● |
| 0.2932*** (0) | 0.1850*** (0) | 0.3214*** (0) | 0.1951*** (0) | ● | ● | ○ | ● | ● | ○ | ○ |
| 0.2939*** (0) | 0.1896*** (0) | 0.3195*** (0) | 0.1959*** (0) | ● | ● | ○ | ● | ○ | ● | ○ |
| 0.2453*** (0) | 0.2389*** (0) | 0.2478*** (0) | 0.2382*** (0) | ● | ● | ○ | ● | ○ | ○ | ● |
| 0.2888*** (0) | 0.1848*** (0) | 0.3153*** (0) | 0.1928*** (0) | ● | ● | ○ | ○ | ● | ● | ○ |
| 0.2368*** (0) | 0.2308*** (0) | 0.2384*** (0) | 0.2284*** (0) | ● | ● | ○ | ○ | ● | ○ | ● |
| 0.2367*** (0) | 0.2307*** (0) | 0.2368*** (0) | 0.2267*** (0) | ● | ● | ○ | ○ | ○ | ● | ● |
| 0.3134*** (0) | 0.2185*** (0) | 0.3284*** (0) | 0.2166*** (0) | ● | ○ | ● | ● | ● | ○ | ○ |
| 0.3121*** (0) | 0.2162*** (0) | 0.3269*** (0) | 0.2128*** (0) | ● | ○ | ● | ● | ○ | ● | ○ |
| 0.2598*** (0) | 0.2559*** (0) | 0.2511*** (0) | 0.2442*** (0) | ● | ○ | ● | ● | ○ | ○ | ● |
| 0.3113*** (0) | 0.2191*** (0) | 0.3247*** (0) | 0.2151*** (0) | ● | ○ | ● | ○ | ● | ● | ○ |
| 0.2647*** (0) | 0.2605*** (0) | 0.2546*** (0) | 0.2475*** (0) | ● | ○ | ● | ○ | ● | ○ | ● |
| 0.2612*** (0) | 0.2573*** (0) | 0.2503*** (0) | 0.2431*** (0) | ● | ○ | ● | ○ | ○ | ● | ● |
| 0.3104*** (0) | 0.2167*** (0) | 0.3247*** (0) | 0.2139*** (0) | ● | ○ | ○ | ● | ● | ● | ○ |
| 0.2611*** (0) | 0.2569*** (0) | 0.2508*** (0) | 0.2441*** (0) | ● | ○ | ○ | ● | ● | ○ | ● |
| 0.2654*** (0) | 0.2611*** (0) | 0.2538*** (0) | 0.2470*** (0) | ● | ○ | ○ | ● | ○ | ● | ● |
| 0.2646*** (0) | 0.2604*** (0) | 0.2530*** (0) | 0.2459*** (0) | ● | ○ | ○ | ○ | ● | ● | ● |
| 0.2161*** (0) | 0.1112*** (0) | 0.3148*** (0) | 0.1930*** (0) | ○ | ● | ● | ● | ● | ○ | ○ |
| 0.2127*** (0) | 0.1099*** (0) | 0.3110*** (0) | 0.1907*** (0) | ○ | ● | ● | ● | ○ | ● | ○ |
| 0.1483*** (0) | 0.1406*** (0) | 0.2260*** (0) | 0.2164*** (0) | ○ | ● | ● | ● | ○ | ○ | ● |
| 0.2130*** (0) | 0.1101*** (0) | 0.3114*** (0) | 0.1909*** (0) | ○ | ● | ● | ○ | ● | ● | ○ |
| 0.1560*** (0) | 0.1485*** (0) | 0.2317*** (0) | 0.2217*** (0) | ○ | ● | ● | ○ | ● | ○ | ● |
| 0.1522*** (0) | 0.1444*** (0) | 0.2291*** (0) | 0.2192*** (0) | ○ | ● | ● | ○ | ○ | ● | ● |
| 0.2111*** (0) | 0.1050*** (0) | 0.3120*** (0) | 0.1877*** (0) | ○ | ● | ○ | ● | ● | ● | ○ |
| 0.1514*** (0) | 0.1441*** (0) | 0.2280*** (0) | 0.2182*** (0) | ○ | ● | ○ | ● | ● | ○ | ● |
| 0.1361*** (0) | 0.1289*** (0) | 0.2221*** (0) | 0.2125*** (0) | ○ | ● | ○ | ● | ○ | ● | ● |
| 0.1528*** (0) | 0.1455*** (0) | 0.2286*** (0) | 0.2186*** (0) | ○ | ● | ○ | ○ | ● | ● | ● |

|               |               |               |               |   |   |   |   |   |   |   |
|---------------|---------------|---------------|---------------|---|---|---|---|---|---|---|
| 0.2357*** (0) | 0.1412*** (0) | 0.3222*** (0) | 0.2115*** (0) | ○ | ○ | ● | ● | ● | ● | ○ |
| 0.1811*** (0) | 0.1755*** (0) | 0.2450*** (0) | 0.2382*** (0) | ○ | ○ | ● | ● | ● | ○ | ● |
| 0.1795*** (0) | 0.1735*** (0) | 0.2448*** (0) | 0.2382*** (0) | ○ | ○ | ● | ● | ○ | ● | ● |
| 0.1836*** (0) | 0.1781*** (0) | 0.2465*** (0) | 0.2393*** (0) | ○ | ○ | ● | ○ | ● | ● | ● |
| 0.1815*** (0) | 0.1760*** (0) | 0.2452*** (0) | 0.2384*** (0) | ○ | ○ | ○ | ● | ● | ● | ● |
| 0.2932*** (0) | 0.1890*** (0) | 0.3198*** (0) | 0.1973*** (0) | ● | ● | ● | ● | ● | ○ | ○ |
| 0.2915*** (0) | 0.1863*** (0) | 0.3178*** (0) | 0.1928*** (0) | ● | ● | ● | ● | ○ | ● | ○ |
| 0.2334*** (0) | 0.2277*** (0) | 0.2362*** (0) | 0.2265*** (0) | ● | ● | ● | ● | ○ | ○ | ● |
| 0.2896*** (0) | 0.1879*** (0) | 0.3150*** (0) | 0.1944*** (0) | ● | ● | ● | ○ | ● | ● | ○ |
| 0.2363*** (0) | 0.2303*** (0) | 0.2379*** (0) | 0.2279*** (0) | ● | ● | ● | ○ | ● | ○ | ● |
| 0.2322*** (0) | 0.2265*** (0) | 0.2331*** (0) | 0.2230*** (0) | ● | ● | ● | ○ | ○ | ● | ● |
| 0.2891*** (0) | 0.1855*** (0) | 0.3153*** (0) | 0.1928*** (0) | ● | ● | ○ | ● | ● | ● | ○ |
| 0.2327*** (0) | 0.2267*** (0) | 0.2343*** (0) | 0.2246*** (0) | ● | ● | ○ | ● | ● | ○ | ● |
| 0.2357*** (0) | 0.2298*** (0) | 0.2359*** (0) | 0.2260*** (0) | ● | ● | ○ | ● | ○ | ● | ● |
| 0.2340*** (0) | 0.2281*** (0) | 0.2346*** (0) | 0.2246*** (0) | ● | ● | ○ | ○ | ● | ● | ● |
| 0.3107*** (0) | 0.2179*** (0) | 0.3247*** (0) | 0.2142*** (0) | ● | ○ | ● | ● | ● | ● | ○ |
| 0.2594*** (0) | 0.2554*** (0) | 0.2497*** (0) | 0.2430*** (0) | ● | ○ | ● | ● | ● | ○ | ● |
| 0.2586*** (0) | 0.2547*** (0) | 0.2484*** (0) | 0.2415*** (0) | ● | ○ | ● | ● | ○ | ● | ● |
| 0.2613*** (0) | 0.2573*** (0) | 0.2503*** (0) | 0.2431*** (0) | ● | ○ | ● | ○ | ● | ● | ● |
| 0.2609*** (0) | 0.2568*** (0) | 0.2503*** (0) | 0.2435*** (0) | ● | ○ | ○ | ● | ● | ● | ● |
| 0.2129*** (0) | 0.1099*** (0) | 0.3114*** (0) | 0.1907*** (0) | ○ | ● | ● | ● | ● | ● | ○ |
| 0.1522*** (0) | 0.1448*** (0) | 0.2282*** (0) | 0.2185*** (0) | ○ | ● | ● | ● | ● | ○ | ● |
| 0.1501*** (0) | 0.1424*** (0) | 0.2273*** (0) | 0.2177*** (0) | ○ | ● | ● | ● | ○ | ● | ● |
| 0.1531*** (0) | 0.1457*** (0) | 0.2284*** (0) | 0.2184*** (0) | ○ | ● | ● | ○ | ● | ● | ● |
| 0.1509*** (0) | 0.1436*** (0) | 0.2271*** (0) | 0.2173*** (0) | ○ | ● | ○ | ● | ● | ● | ● |
| 0.1808*** (0) | 0.1753*** (0) | 0.2446*** (0) | 0.2377*** (0) | ○ | ○ | ● | ● | ● | ● | ● |
| 0.2896*** (0) | 0.1879*** (0) | 0.3150*** (0) | 0.1942*** (0) | ● | ● | ● | ● | ● | ● | ○ |
| 0.2323*** (0) | 0.2264*** (0) | 0.2340*** (0) | 0.2243*** (0) | ● | ● | ● | ● | ● | ○ | ● |
| 0.2310*** (0) | 0.2253*** (0) | 0.2321*** (0) | 0.2222*** (0) | ● | ● | ● | ● | ○ | ● | ● |
| 0.2325*** (0) | 0.2268*** (0) | 0.2332*** (0) | 0.2232*** (0) | ● | ● | ● | ○ | ● | ● | ● |
| 0.2321*** (0) | 0.2262*** (0) | 0.2331*** (0) | 0.2233*** (0) | ● | ● | ○ | ● | ● | ● | ● |
| 0.2588*** (0) | 0.2548*** (0) | 0.2485*** (0) | 0.2417*** (0) | ● | ○ | ● | ● | ● | ● | ● |
| 0.1515*** (0) | 0.1441*** (0) | 0.2272*** (0) | 0.2175*** (0) | ○ | ● | ● | ● | ● | ● | ● |
| 0.2312*** (0) | 0.2254*** (0) | 0.2322*** (0) | 0.2223*** (0) | ● | ● | ● | ● | ● | ● | ● |
| 0.2579*** (0) | 0.2073*** (0) | 0.2445*** (0) | 0.2020*** (0) | ● | ● | ● | ● | ● | ● | ● |

\*\*\*  $P < 0.0001$ ; \*\*  $0.0001 \leq P < 0.001$ ; \*  $0.001 \leq P < 0.01$
