# Supplementary material for: Pervasive Hitchhiking at Coding and Regulatory Sites in Humans
Source: PubMed Central journal article supplement (PMC2613029; doi:10.1371/journal.pgen.1000336), 2009-01-16
Supplement: pgen.1000336.s014.pdf [file pgen.1000336.s014.pdf]

Table S4. Partial Spearman rank correlation coefficients controlling for the depth of sequencing coverage (SC) of Watson data. Partial Spearman rank correlation coefficients between functional divergence [i.e. the divergence at coding sites ( $D_n$ ) or the divergence at conserved noncoding region ( $D_x$ )] and neutral polymorphism [i.e. the level of neutral polymorphism ( $\theta_{neu}$ ) and the level of normalized neutral polymorphism ( $P_{neu}=\theta_{neu}/d_{neu}$ )], and between functional constraints [i.e. the number of codons ( $FD_n$ ) and the number of conserved noncoding sites ( $FD_x$ )] and neutral polymorphism ( $\theta_{neu}$  and  $P_{neu}$ ) are given. Spearman's partial correlation coefficients were calculated by controlling for all possible combinations of potentially confounding variables. The results of representative combinations are given here. Closed circles (●) indicate the controlled variables. These variables are GC content (GC), the density of simple repeats (RD), the depth of sequencing coverage (SC), the divergence at coding sites ( $D_n$ ), the divergence at conserved noncoding region ( $D_x$ ), the number of codons ( $FD_n$ ), the number of conserved noncoding sites ( $FD_x$ ), and the level of neutral divergence rate ( $d_{neu}$ ). Open circles (○) indicate the variables that were not controlled in a particular analysis. (W) indicates the results are based on the Watson data.  $P$ -values are given in parentheses.

| $D_n$ and $\theta_{neu}$   | $D_n$ and $P_{neu}$        |    |    |    |    |       |       |        |        |           |
|----------------------------|----------------------------|----|----|----|----|-------|-------|--------|--------|-----------|
| Watson $\theta_{neu}$      | Watson $P_{neu}$           | RR | GC | RD | SC | $D_n$ | $D_x$ | $FD_n$ | $FD_x$ | $d_{neu}$ |
| -0.1484*** (0)             | -0.0835*** (0)             | ○  | ○  | ○  | ●  | ○     | ○     | ○      | ○      | ○         |
| -0.1842*** (0)             | -0.1030*** (0)             | ●  | ○  | ○  | ●  | ○     | ○     | ○      | ○      | ○         |
| -0.1488*** (0)             | -0.1021*** (0)             | ○  | ●  | ○  | ●  | ○     | ○     | ○      | ○      | ○         |
| -0.1591*** (0)             | -0.0987*** (0)             | ○  | ○  | ●  | ●  | ○     | ○     | ○      | ○      | ○         |
| -0.1335*** (0)             | -0.0693*** (0)             | ○  | ○  | ○  | ●  | ○     | ●     | ○      | ○      | ○         |
| 0.0420*** (1.794467e-010)  | -0.0316*** (1.555604e-006) | ○  | ○  | ○  | ●  | ○     | ○     | ●      | ○      | ○         |
| -0.0224** (6.663786e-004)  | -0.0324*** (8.417918e-007) | ○  | ○  | ○  | ●  | ○     | ○     | ○      | ●      | ○         |
| -0.0883*** (0)             | -0.0868*** (0)             | ○  | ○  | ○  | ●  | ○     | ○     | ○      | ○      | ●         |
| -0.1041*** (0)             | -0.0731*** (0)             | ●  | ●  | ○  | ●  | ○     | ○     | ○      | ○      | ○         |
| -0.1741*** (0)             | -0.1046*** (0)             | ●  | ○  | ●  | ●  | ○     | ○     | ○      | ○      | ○         |
| -0.1712*** (0)             | -0.0902*** (0)             | ●  | ○  | ○  | ●  | ○     | ●     | ○      | ○      | ○         |
| 0.0219** (8.594909e-004)   | -0.0461*** (2.316258e-012) | ●  | ○  | ○  | ●  | ○     | ○     | ●      | ○      | ○         |
| -0.0598*** (0)             | -0.0556*** (0)             | ●  | ○  | ○  | ●  | ○     | ○     | ○      | ●      | ○         |
| -0.1260*** (0)             | -0.1231*** (0)             | ●  | ○  | ○  | ●  | ○     | ○     | ○      | ○      | ●         |
| -0.1532*** (0)             | -0.1070*** (0)             | ○  | ●  | ●  | ●  | ○     | ○     | ○      | ○      | ○         |
| -0.1351*** (0)             | -0.0889*** (0)             | ○  | ●  | ○  | ●  | ○     | ●     | ○      | ○      | ○         |
| 0.0406*** (6.481587e-010)  | -0.0329*** (5.700460e-007) | ○  | ●  | ○  | ●  | ○     | ○     | ●      | ○      | ○         |
| -0.0411*** (4.035233e-010) | -0.0520*** (2.664535e-015) | ○  | ●  | ○  | ●  | ○     | ○     | ○      | ●      | ○         |
| -0.1057*** (0)             | -0.1043*** (0)             | ○  | ●  | ○  | ●  | ○     | ○     | ○      | ○      | ●         |
| -0.1447*** (0)             | -0.0848*** (0)             | ○  | ○  | ●  | ●  | ○     | ●     | ○      | ○      | ○         |
| 0.0422*** (1.358813e-010)  | -0.0316*** (1.595835e-006) | ○  | ○  | ●  | ●  | ○     | ○     | ●      | ○      | ○         |

|                            |                            |   |   |   |   |   |   |   |   |   |
|----------------------------|----------------------------|---|---|---|---|---|---|---|---|---|
| -0.0320*** (1.120025e-006) | -0.0413*** (3.298196e-010) | ○ | ○ | ● | ● | ○ | ○ | ○ | ○ | ○ |
| -0.1013*** (0)             | -0.1018*** (0)             | ○ | ○ | ● | ● | ○ | ○ | ○ | ○ | ● |
| 0.0448*** (9.282686e-012)  | -0.0282*** (1.813066e-005) | ○ | ○ | ○ | ● | ○ | ● | ● | ○ | ○ |
| -0.0217** (9.544143e-004)  | -0.0355*** (6.782377e-008) | ○ | ○ | ○ | ● | ○ | ● | ○ | ● | ○ |
| -0.0731*** (0)             | -0.0728*** (0)             | ○ | ○ | ○ | ● | ○ | ● | ○ | ○ | ● |
| 0.0176* (7.539606e-003)    | -0.0467*** (1.267209e-012) | ○ | ○ | ○ | ● | ○ | ○ | ● | ● | ○ |
| -0.0237** (3.102589e-004)  | -0.0251** (1.360732e-004)  | ○ | ○ | ○ | ● | ○ | ○ | ● | ○ | ● |
| -0.0316*** (1.612537e-006) | -0.0315*** (1.731546e-006) | ○ | ○ | ○ | ● | ○ | ○ | ○ | ● | ● |
| -0.1039*** (0)             | -0.0758*** (0)             | ● | ● | ● | ● | ○ | ○ | ○ | ○ | ○ |
| -0.0941*** (0)             | -0.0624*** (0)             | ● | ● | ○ | ● | ○ | ● | ○ | ○ | ○ |
| 0.0207* (1.635053e-003)    | -0.0467*** (1.259437e-012) | ● | ● | ○ | ● | ○ | ○ | ● | ○ | ○ |
| -0.0310*** (2.387944e-006) | -0.0458*** (3.362199e-012) | ● | ● | ○ | ● | ○ | ○ | ○ | ● | ○ |
| -0.0841*** (0)             | -0.0834*** (0)             | ● | ● | ○ | ● | ○ | ○ | ○ | ○ | ● |
| -0.1627*** (0)             | -0.0926*** (0)             | ● | ○ | ● | ● | ○ | ● | ○ | ○ | ○ |
| 0.0219** (8.876913e-004)   | -0.0457*** (3.550049e-012) | ● | ○ | ● | ● | ○ | ○ | ● | ○ | ○ |
| -0.0596*** (0)             | -0.0577*** (0)             | ● | ○ | ● | ● | ○ | ○ | ○ | ● | ○ |
| -0.1232*** (0)             | -0.1226*** (0)             | ● | ○ | ● | ● | ○ | ○ | ○ | ○ | ● |
| 0.0241** (2.515330e-004)   | -0.0431*** (5.654122e-011) | ● | ○ | ○ | ● | ○ | ● | ● | ○ | ○ |
| -0.0584*** (0)             | -0.0582*** (0)             | ● | ○ | ○ | ● | ○ | ● | ○ | ● | ○ |
| -0.1121*** (0)             | -0.1104*** (0)             | ● | ○ | ○ | ● | ○ | ● | ○ | ○ | ● |
| 0.0028 (6.677852e-001)     | -0.0574*** (0)             | ● | ○ | ○ | ● | ○ | ○ | ● | ● | ○ |
| -0.0243** (2.207753e-004)  | -0.0257*** (9.535484e-005) | ● | ○ | ○ | ● | ○ | ○ | ● | ○ | ● |
| -0.0585*** (0)             | -0.0575*** (0)             | ● | ○ | ○ | ● | ○ | ○ | ○ | ● | ● |
| -0.1393*** (0)             | -0.0935*** (0)             | ○ | ● | ● | ● | ○ | ● | ○ | ○ | ○ |
| 0.0412*** (3.878577e-010)  | -0.0326*** (7.491163e-007) | ○ | ● | ● | ● | ○ | ○ | ● | ○ | ○ |
| -0.0433*** (4.891265e-011) | -0.0539*** (2.220446e-016) | ○ | ● | ● | ● | ○ | ○ | ○ | ● | ○ |
| -0.1098*** (0)             | -0.1093*** (0)             | ○ | ● | ● | ● | ○ | ○ | ○ | ○ | ● |
| 0.0434*** (4.267864e-011)  | -0.0296*** (6.798181e-006) | ○ | ● | ○ | ● | ○ | ● | ● | ○ | ○ |
| -0.0404*** (8.136856e-010) | -0.0534*** (4.440892e-016) | ○ | ● | ○ | ● | ○ | ● | ○ | ● | ○ |
| -0.0914*** (0)             | -0.0911*** (0)             | ○ | ● | ○ | ● | ○ | ● | ○ | ○ | ● |
| 0.0162 (1.395493e-002)     | -0.0480*** (2.835510e-013) | ○ | ● | ○ | ● | ○ | ○ | ● | ● | ○ |
| -0.0245** (1.929563e-004)  | -0.0259*** (8.290254e-005) | ○ | ● | ○ | ● | ○ | ○ | ● | ○ | ● |
| -0.0513*** (6.439294e-015) | -0.0511*** (8.104628e-015) | ○ | ● | ○ | ● | ○ | ○ | ○ | ● | ● |

|                            |                            |   |   |   |   |   |   |   |   |   |
|----------------------------|----------------------------|---|---|---|---|---|---|---|---|---|
| 0.0452*** (6.072365e-012)  | -0.0281*** (1.989336e-005) | ○ | ○ | ● | ● | ○ | ● | ● | ○ | ○ |
| -0.0312*** (2.157583e-006) | -0.0441*** (2.076084e-011) | ○ | ○ | ● | ● | ○ | ● | ○ | ● | ○ |
| -0.0865*** (0)             | -0.0881*** (0)             | ○ | ○ | ● | ● | ○ | ● | ○ | ○ | ● |
| 0.0163 (1.301204e-002)     | -0.0480*** (3.020917e-013) | ○ | ○ | ● | ● | ○ | ○ | ● | ● | ○ |
| -0.0229** (4.915017e-004)  | -0.0242** (2.316099e-004)  | ○ | ○ | ● | ● | ○ | ○ | ● | ○ | ● |
| -0.0398*** (1.487575e-009) | -0.0406*** (6.894404e-010) | ○ | ○ | ● | ● | ○ | ○ | ○ | ● | ● |
| 0.0183* (5.449267e-003)    | -0.0396*** (1.816519e-009) | ○ | ○ | ○ | ● | ○ | ● | ● | ● | ○ |
| -0.0205* (1.873100e-003)   | -0.0221** (7.765351e-004)  | ○ | ○ | ○ | ● | ○ | ● | ● | ○ | ● |
| -0.0348*** (1.233967e-007) | -0.0343*** (1.936200e-007) | ○ | ○ | ○ | ● | ○ | ● | ○ | ● | ● |
| -0.0388*** (3.642590e-009) | -0.0400*** (1.157386e-009) | ○ | ○ | ○ | ● | ○ | ○ | ● | ● | ● |
| -0.0942*** (0)             | -0.0652*** (0)             | ● | ● | ● | ● | ○ | ● | ○ | ○ | ○ |
| 0.0210* (1.452075e-003)    | -0.0462*** (2.085221e-012) | ● | ● | ● | ● | ○ | ○ | ● | ○ | ○ |
| -0.0317*** (1.494569e-006) | -0.0469*** (9.888756e-013) | ● | ● | ● | ● | ○ | ○ | ○ | ● | ○ |
| -0.0851*** (0)             | -0.0855*** (0)             | ● | ● | ● | ● | ○ | ○ | ○ | ○ | ● |
| 0.0230** (4.713263e-004)   | -0.0436*** (3.317846e-011) | ● | ● | ○ | ● | ○ | ● | ● | ○ | ○ |
| -0.0308*** (2.943367e-006) | -0.0475*** (5.141443e-013) | ● | ● | ○ | ● | ○ | ● | ○ | ● | ○ |
| -0.0726*** (0)             | -0.0730*** (0)             | ● | ● | ○ | ● | ○ | ● | ○ | ○ | ● |
| 0.0025 (7.047857e-001)     | -0.0575*** (0)             | ● | ● | ○ | ● | ○ | ○ | ● | ● | ○ |
| -0.0236** (3.362312e-004)  | -0.0250** (1.443408e-004)  | ● | ● | ○ | ● | ○ | ○ | ● | ○ | ● |
| -0.0412*** (3.739248e-010) | -0.0414*** (3.283945e-010) | ● | ● | ○ | ● | ○ | ○ | ○ | ● | ● |
| 0.0241** (2.576414e-004)   | -0.0426*** (9.156476e-011) | ● | ○ | ● | ● | ○ | ● | ● | ○ | ○ |
| -0.0582*** (0)             | -0.0601*** (0)             | ● | ○ | ● | ● | ○ | ● | ○ | ● | ○ |
| -0.1104*** (0)             | -0.1108*** (0)             | ● | ○ | ● | ● | ○ | ● | ○ | ○ | ● |
| 0.0028 (6.686183e-001)     | -0.0574*** (0)             | ● | ○ | ● | ● | ○ | ○ | ● | ● | ○ |
| -0.0242** (2.316516e-004)  | -0.0255** (1.087283e-004)  | ● | ○ | ● | ● | ○ | ○ | ● | ○ | ● |
| -0.0592*** (0)             | -0.0591*** (0)             | ● | ○ | ● | ● | ○ | ○ | ○ | ● | ● |
| 0.0025 (6.999443e-001)     | -0.0507*** (1.265654e-014) | ● | ○ | ○ | ● | ○ | ● | ● | ● | ○ |
| -0.0217** (9.562586e-004)  | -0.0234** (3.820223e-004)  | ● | ○ | ○ | ● | ○ | ● | ● | ○ | ● |
| -0.0600*** (0)             | -0.0587*** (0)             | ● | ○ | ○ | ● | ○ | ● | ○ | ● | ● |
| -0.0375*** (1.163820e-008) | -0.0388*** (3.690394e-009) | ● | ○ | ○ | ● | ○ | ○ | ● | ● | ● |
| 0.0441*** (2.105505e-011)  | -0.0291*** (9.596221e-006) | ○ | ● | ● | ● | ○ | ● | ● | ○ | ○ |
| -0.0425*** (1.028878e-010) | -0.0553*** (0)             | ○ | ● | ● | ● | ○ | ● | ○ | ● | ○ |
| -0.0955*** (0)             | -0.0959*** (0)             | ○ | ● | ● | ● | ○ | ● | ○ | ○ | ● |

|                            |                            |   |   |   |   |   |   |   |   |   |
|----------------------------|----------------------------|---|---|---|---|---|---|---|---|---|
| 0.0155 (1.842674e-002)     | -0.0488*** (1.253442e-013) | ○ | ● | ● | ● | ○ | ○ | ● | ● | ○ |
| -0.0237** (3.103718e-004)  | -0.0250** (1.469243e-004)  | ○ | ● | ● | ● | ○ | ○ | ● | ○ | ● |
| -0.0529*** (8.881784e-016) | -0.0530*** (7.771561e-016) | ○ | ● | ● | ● | ○ | ○ | ○ | ● | ● |
| 0.0161 (1.430726e-002)     | -0.0415*** (2.838294e-010) | ○ | ● | ○ | ● | ○ | ● | ● | ● | ○ |
| -0.0214* (1.161412e-003)   | -0.0230** (4.669270e-004)  | ○ | ● | ○ | ● | ○ | ● | ● | ○ | ● |
| -0.0528*** (9.992007e-016) | -0.0523*** (1.776357e-015) | ○ | ● | ○ | ● | ○ | ● | ○ | ● | ● |
| -0.0397*** (1.544897e-009) | -0.0410*** (4.819685e-010) | ○ | ● | ○ | ● | ○ | ○ | ● | ● | ● |
| 0.0169 (1.039759e-002)     | -0.0410*** (4.664537e-010) | ○ | ○ | ● | ● | ○ | ● | ● | ● | ○ |
| -0.0196* (2.936739e-003)   | -0.0211* (1.316466e-003)   | ○ | ○ | ● | ● | ○ | ● | ● | ○ | ● |
| -0.0426*** (9.595047e-011) | -0.0429*** (6.723444e-011) | ○ | ○ | ● | ● | ○ | ● | ○ | ● | ● |
| -0.0392*** (2.503486e-009) | -0.0405*** (7.427322e-010) | ○ | ○ | ● | ● | ○ | ○ | ● | ● | ● |
| -0.0318*** (1.346045e-006) | -0.0341*** (2.125840e-007) | ○ | ○ | ○ | ● | ○ | ● | ● | ● | ● |
| 0.0233** (3.997541e-004)   | -0.0431*** (5.920742e-011) | ● | ● | ● | ● | ○ | ● | ● | ○ | ○ |
| -0.0314*** (1.855196e-006) | -0.0486*** (1.477707e-013) | ● | ● | ● | ● | ○ | ● | ○ | ● | ○ |
| -0.0739*** (0)             | -0.0752*** (0)             | ● | ● | ● | ● | ○ | ● | ○ | ○ | ● |
| 0.0024 (7.109458e-001)     | -0.0577*** (0)             | ● | ● | ● | ● | ○ | ○ | ● | ● | ○ |
| -0.0234** (3.875706e-004)  | -0.0246** (1.829806e-004)  | ● | ● | ● | ● | ○ | ○ | ● | ○ | ● |
| -0.0419*** (1.822558e-010) | -0.0424*** (1.109141e-010) | ● | ● | ● | ● | ○ | ○ | ○ | ● | ● |
| 0.0031 (6.411357e-001)     | -0.0505*** (1.565414e-014) | ● | ● | ○ | ● | ○ | ● | ● | ● | ○ |
| -0.0210* (1.442739e-003)   | -0.0227** (5.760952e-004)  | ● | ● | ○ | ● | ○ | ● | ● | ○ | ● |
| -0.0426*** (9.957624e-011) | -0.0424*** (1.146694e-010) | ● | ● | ○ | ● | ○ | ● | ○ | ● | ● |
| -0.0365*** (2.943440e-008) | -0.0378*** (9.060346e-009) | ● | ● | ○ | ● | ○ | ○ | ● | ● | ● |
| 0.0025 (7.013048e-001)     | -0.0508*** (1.121325e-014) | ● | ○ | ● | ● | ○ | ● | ● | ● | ○ |
| -0.0216* (1.019735e-003)   | -0.0231** (4.450541e-004)  | ● | ○ | ● | ● | ○ | ● | ● | ○ | ● |
| -0.0607*** (0)             | -0.0602*** (0)             | ● | ○ | ● | ● | ○ | ● | ○ | ● | ● |
| -0.0376*** (1.086180e-008) | -0.0390*** (3.194188e-009) | ● | ○ | ● | ● | ○ | ○ | ● | ● | ● |
| -0.0327*** (6.993112e-007) | -0.0350*** (1.050080e-007) | ● | ○ | ○ | ● | ○ | ● | ● | ● | ● |
| 0.0155 (1.856714e-002)     | -0.0422*** (1.462791e-010) | ○ | ● | ● | ● | ○ | ● | ● | ● | ○ |
| -0.0205* (1.887505e-003)   | -0.0220** (8.427144e-004)  | ○ | ● | ● | ● | ○ | ● | ● | ○ | ● |
| -0.0544*** (1.110223e-016) | -0.0542*** (2.220446e-016) | ○ | ● | ● | ● | ○ | ● | ○ | ● | ● |
| -0.0399*** (1.385339e-009) | -0.0411*** (4.182614e-010) | ○ | ● | ● | ● | ○ | ○ | ● | ● | ● |
| -0.0333*** (4.029085e-007) | -0.0357*** (5.892904e-008) | ○ | ● | ○ | ● | ○ | ● | ● | ● | ● |
| -0.0324*** (8.405642e-007) | -0.0348*** (1.198690e-007) | ○ | ○ | ● | ● | ○ | ● | ● | ● | ● |

|                                                       |                                                  |    |    |    |    |       |       |        |        |           |
|-------------------------------------------------------|--------------------------------------------------|----|----|----|----|-------|-------|--------|--------|-----------|
| 0.0030 (6.465238e-001)                                | -0.0506*** (1.387779e-014)                       | ●  | ●  | ●  | ●  | ○     | ●     | ●      | ●      | ○         |
| -0.0207* (1.699385e-003)                              | -0.0222** (7.508353e-004)                        | ●  | ●  | ●  | ●  | ○     | ●     | ●      | ○      | ●         |
| -0.0433*** (4.802625e-011)                            | -0.0435*** (3.823164e-011)                       | ●  | ●  | ●  | ●  | ○     | ●     | ○      | ●      | ●         |
| -0.0366*** (2.731661e-008)                            | -0.0380*** (8.033108e-009)                       | ●  | ●  | ●  | ●  | ○     | ○     | ●      | ●      | ●         |
| -0.0312*** (2.086485e-006)                            | -0.0337*** (3.125535e-007)                       | ●  | ●  | ○  | ●  | ○     | ●     | ●      | ●      | ●         |
| -0.0327*** (6.550178e-007)                            | -0.0352*** (9.115795e-008)                       | ●  | ○  | ●  | ●  | ○     | ●     | ●      | ●      | ●         |
| -0.0335*** (3.620750e-007)                            | -0.0358*** (5.109727e-008)                       | ○  | ●  | ●  | ●  | ○     | ●     | ●      | ●      | ●         |
| -0.0313*** (1.967982e-006)                            | -0.0338*** (2.834373e-007)                       | ●  | ●  | ●  | ●  | ○     | ●     | ●      | ●      | ●         |
| -0.0648*** (6.694256e-023)                            | -0.0269*** (4.436343e-005)                       | ●  | ●  | ●  | ●  | ○     | ●     | ●      | ●      | ●         |
| <b><math>D_x</math> and <math>\theta_{neu}</math></b> | <b><math>D_x</math> and <math>P_{neu}</math></b> |    |    |    |    |       |       |        |        |           |
| Watson $\theta_{neu}$                                 | Watson $P_{neu}$                                 | RR | GC | RD | SC | $D_n$ | $D_x$ | $FD_n$ | $FD_x$ | $d_{neu}$ |
| -0.0861*** (0)                                        | -0.0741*** (0)                                   | ○  | ○  | ○  | ●  | ○     | ○     | ○      | ○      | ○         |
| -0.0805*** (0)                                        | -0.0693*** (0)                                   | ●  | ○  | ○  | ●  | ○     | ○     | ○      | ○      | ○         |
| -0.0836*** (0)                                        | -0.0756*** (0)                                   | ○  | ●  | ○  | ●  | ○     | ○     | ○      | ○      | ○         |
| -0.0883*** (0)                                        | -0.0784*** (0)                                   | ○  | ○  | ●  | ●  | ○     | ○     | ○      | ○      | ○         |
| -0.0560*** (0)                                        | -0.0577*** (0)                                   | ○  | ○  | ○  | ●  | ●     | ○     | ○      | ○      | ○         |
| -0.0464*** (1.670775e-012)                            | -0.0589*** (0)                                   | ○  | ○  | ○  | ●  | ○     | ○     | ●      | ○      | ○         |
| 0.0089 (1.745154e-001)                                | -0.0364*** (3.129826e-008)                       | ○  | ○  | ○  | ●  | ○     | ○     | ○      | ●      | ○         |
| -0.0802*** (0)                                        | -0.0745*** (0)                                   | ○  | ○  | ○  | ●  | ○     | ○     | ○      | ○      | ●         |
| -0.0617*** (0)                                        | -0.0615*** (0)                                   | ●  | ●  | ○  | ●  | ○     | ○     | ○      | ○      | ○         |
| -0.0749*** (0)                                        | -0.0691*** (0)                                   | ●  | ○  | ●  | ●  | ○     | ○     | ○      | ○      | ○         |
| -0.0418*** (2.128405e-010)                            | -0.0482*** (2.469136e-013)                       | ●  | ○  | ○  | ●  | ●     | ○     | ○      | ○      | ○         |
| -0.0335*** (3.547692e-007)                            | -0.0507*** (1.321165e-014)                       | ●  | ○  | ○  | ●  | ○     | ○     | ●      | ○      | ○         |
| 0.0210* (1.451977e-003)                               | -0.0301*** (4.904770e-006)                       | ●  | ○  | ○  | ●  | ○     | ○     | ○      | ●      | ○         |
| -0.0771*** (0)                                        | -0.0713*** (0)                                   | ●  | ○  | ○  | ●  | ○     | ○     | ○      | ○      | ●         |
| -0.0860*** (0)                                        | -0.0783*** (0)                                   | ○  | ●  | ●  | ●  | ○     | ○     | ○      | ○      | ○         |
| -0.0551*** (0)                                        | -0.0563*** (0)                                   | ○  | ●  | ○  | ●  | ●     | ○     | ○      | ○      | ○         |
| -0.0434*** (4.048162e-011)                            | -0.0564*** (0)                                   | ○  | ●  | ○  | ●  | ○     | ○     | ●      | ○      | ○         |
| 0.0166 (1.143016e-002)                                | -0.0290*** (1.045216e-005)                       | ○  | ●  | ○  | ●  | ○     | ○     | ○      | ●      | ○         |
| -0.0814*** (0)                                        | -0.0757*** (0)                                   | ○  | ●  | ○  | ●  | ○     | ○     | ○      | ○      | ●         |
| -0.0579*** (0)                                        | -0.0599*** (0)                                   | ○  | ○  | ●  | ●  | ●     | ○     | ○      | ○      | ○         |
| -0.0483*** (2.020606e-013)                            | -0.0606*** (0)                                   | ○  | ○  | ●  | ●  | ○     | ○     | ●      | ○      | ○         |
| 0.0124 (5.964048e-002)                                | -0.0334*** (3.807884e-007)                       | ○  | ○  | ●  | ●  | ○     | ○     | ○      | ●      | ○         |

|                            |                            |   |   |   |   |   |   |   |   |   |
|----------------------------|----------------------------|---|---|---|---|---|---|---|---|---|
| -0.0837*** (0)             | -0.0787*** (0)             | ○ | ○ | ● | ● | ○ | ○ | ○ | ○ | ● |
| -0.0491*** (8.737455e-014) | -0.0571*** (0)             | ○ | ○ | ○ | ● | ● | ○ | ● | ○ | ○ |
| 0.0071 (2.778932e-001)     | -0.0392*** (2.562068e-009) | ○ | ○ | ○ | ● | ● | ○ | ○ | ● | ○ |
| -0.0630*** (0)             | -0.0575*** (0)             | ○ | ○ | ○ | ● | ● | ○ | ○ | ○ | ● |
| -0.0015 (8.140994e-001)    | -0.0390*** (3.047346e-009) | ○ | ○ | ○ | ● | ○ | ○ | ● | ● | ○ |
| -0.0629*** (0)             | -0.0576*** (0)             | ○ | ○ | ○ | ● | ○ | ○ | ● | ○ | ● |
| -0.0363*** (3.504312e-008) | -0.0311*** (2.350417e-006) | ○ | ○ | ○ | ● | ○ | ○ | ○ | ● | ● |
| -0.0613*** (0)             | -0.0629*** (0)             | ● | ● | ● | ● | ○ | ○ | ○ | ○ | ○ |
| -0.0425*** (1.098766e-010) | -0.0483*** (2.143841e-013) | ● | ● | ○ | ● | ● | ○ | ○ | ○ | ○ |
| -0.0357*** (5.751271e-008) | -0.0515*** (4.662937e-015) | ● | ● | ○ | ● | ○ | ○ | ● | ○ | ○ |
| 0.0069 (2.955515e-001)     | -0.0358*** (5.160333e-008) | ● | ● | ○ | ● | ○ | ○ | ○ | ● | ○ |
| -0.0663*** (0)             | -0.0609*** (0)             | ● | ● | ○ | ● | ○ | ○ | ○ | ○ | ● |
| -0.0408*** (5.444519e-010) | -0.0490*** (8.959500e-014) | ● | ○ | ● | ● | ● | ○ | ○ | ○ | ○ |
| -0.0334*** (3.816097e-007) | -0.0514*** (5.329071e-015) | ● | ○ | ● | ● | ○ | ○ | ● | ○ | ○ |
| 0.0208* (1.568755e-003)    | -0.0294*** (7.993746e-006) | ● | ○ | ● | ● | ○ | ○ | ○ | ● | ○ |
| -0.0751*** (0)             | -0.0702*** (0)             | ● | ○ | ● | ● | ○ | ○ | ○ | ○ | ● |
| -0.0350*** (1.084014e-007) | -0.0479*** (3.180789e-013) | ● | ○ | ○ | ● | ● | ○ | ● | ○ | ○ |
| 0.0164 (1.290537e-002)     | -0.0346*** (1.496938e-007) | ● | ○ | ○ | ● | ● | ○ | ○ | ● | ○ |
| -0.0511*** (7.993606e-015) | -0.0457*** (3.679723e-012) | ● | ○ | ○ | ● | ● | ○ | ○ | ○ | ● |
| 0.0017 (8.002987e-001)     | -0.0378*** (8.956846e-009) | ● | ○ | ○ | ● | ○ | ○ | ● | ● | ○ |
| -0.0495*** (5.506706e-014) | -0.0444*** (1.548295e-011) | ● | ○ | ○ | ● | ○ | ○ | ● | ○ | ● |
| -0.0175* (7.727445e-003)   | -0.0128 (5.272801e-002)    | ● | ○ | ○ | ● | ○ | ○ | ○ | ● | ● |
| -0.0573*** (0)             | -0.0585*** (0)             | ○ | ● | ● | ● | ● | ○ | ○ | ○ | ○ |
| -0.0457*** (3.817391e-012) | -0.0584*** (0)             | ○ | ● | ● | ● | ○ | ○ | ● | ○ | ○ |
| 0.0169 (1.031112e-002)     | -0.0289*** (1.136953e-005) | ○ | ● | ● | ● | ○ | ○ | ○ | ● | ○ |
| -0.0837*** (0)             | -0.0786*** (0)             | ○ | ● | ● | ● | ○ | ○ | ○ | ○ | ● |
| -0.0460*** (2.684741e-012) | -0.0545*** (1.110223e-016) | ○ | ● | ○ | ● | ● | ○ | ● | ○ | ○ |
| 0.0148 (2.491327e-002)     | -0.0315*** (1.694385e-006) | ○ | ● | ○ | ● | ● | ○ | ○ | ● | ○ |
| -0.0617*** (0)             | -0.0561*** (0)             | ○ | ● | ○ | ● | ● | ○ | ○ | ○ | ● |
| 0.0020 (7.654199e-001)     | -0.0362*** (3.868845e-008) | ○ | ● | ○ | ● | ○ | ○ | ● | ● | ○ |
| -0.0602*** (0)             | -0.0549*** (1.110223e-016) | ○ | ● | ○ | ● | ○ | ○ | ● | ○ | ● |
| -0.0287*** (1.291443e-005) | -0.0235*** (3.626169e-004) | ○ | ● | ○ | ● | ○ | ○ | ○ | ● | ● |
| -0.0510*** (9.214851e-015) | -0.0589*** (0)             | ○ | ○ | ● | ● | ● | ○ | ● | ○ | ○ |

|                            |                            |   |   |   |   |   |   |   |   |   |
|----------------------------|----------------------------|---|---|---|---|---|---|---|---|---|
| 0.0100 (1.304082e-001)     | -0.0368*** (2.330053e-008) | ○ | ○ | ● | ● | ● | ○ | ○ | ● | ○ |
| -0.0650*** (0)             | -0.0597*** (0)             | ○ | ○ | ● | ● | ● | ○ | ○ | ○ | ● |
| -0.0008 (9.052153e-001)    | -0.0385*** (5.048841e-009) | ○ | ○ | ● | ● | ○ | ○ | ● | ● | ○ |
| -0.0643*** (0)             | -0.0592*** (0)             | ○ | ○ | ● | ● | ○ | ○ | ● | ○ | ● |
| -0.0330*** (5.290512e-007) | -0.0274*** (3.123140e-005) | ○ | ○ | ● | ● | ○ | ○ | ○ | ● | ● |
| -0.0053 (4.237589e-001)    | -0.0301*** (4.749013e-006) | ○ | ○ | ○ | ● | ● | ○ | ● | ● | ○ |
| -0.0617*** (0)             | -0.0563*** (0)             | ○ | ○ | ○ | ● | ● | ○ | ● | ○ | ● |
| -0.0391*** (2.735052e-009) | -0.0339*** (2.623484e-007) | ○ | ○ | ○ | ● | ● | ○ | ○ | ● | ● |
| -0.0400*** (1.166316e-009) | -0.0344*** (1.716805e-007) | ○ | ○ | ○ | ● | ○ | ○ | ● | ● | ● |
| -0.0427*** (8.853884e-011) | -0.0496*** (4.729550e-014) | ● | ● | ● | ● | ● | ○ | ○ | ○ | ○ |
| -0.0362*** (3.682690e-008) | -0.0527*** (1.221245e-015) | ● | ● | ● | ● | ○ | ○ | ● | ○ | ○ |
| 0.0070 (2.860584e-001)     | -0.0356*** (6.255422e-008) | ● | ● | ● | ● | ○ | ○ | ○ | ● | ○ |
| -0.0668*** (0)             | -0.0620*** (0)             | ● | ● | ● | ● | ○ | ○ | ○ | ○ | ● |
| -0.0371*** (1.752971e-008) | -0.0488*** (1.212364e-013) | ● | ● | ○ | ● | ● | ○ | ● | ○ | ○ |
| 0.0055 (4.049192e-001)     | -0.0380*** (7.731233e-009) | ● | ● | ○ | ● | ● | ○ | ○ | ● | ○ |
| -0.0509*** (9.547918e-015) | -0.0456*** (4.356404e-012) | ● | ● | ○ | ● | ● | ○ | ○ | ○ | ● |
| -0.0025 (7.071457e-001)    | -0.0395*** (1.869480e-009) | ● | ● | ○ | ● | ○ | ○ | ● | ● | ○ |
| -0.0504*** (1.909584e-014) | -0.0452*** (6.437184e-012) | ● | ● | ○ | ● | ○ | ○ | ● | ○ | ● |
| -0.0249** (1.553185e-004)  | -0.0196* (2.862099e-003)   | ● | ● | ○ | ● | ○ | ○ | ○ | ● | ● |
| -0.0349*** (1.156878e-007) | -0.0487*** (1.350031e-013) | ● | ○ | ● | ● | ● | ○ | ● | ○ | ○ |
| 0.0164 (1.284129e-002)     | -0.0339*** (2.582221e-007) | ● | ○ | ● | ● | ● | ○ | ○ | ● | ○ |
| -0.0511*** (7.549517e-015) | -0.0463*** (2.049028e-012) | ● | ○ | ● | ● | ● | ○ | ○ | ○ | ● |
| 0.0017 (7.978613e-001)     | -0.0377*** (1.016011e-008) | ● | ○ | ● | ● | ○ | ○ | ● | ● | ○ |
| -0.0497*** (4.041212e-014) | -0.0450*** (7.844392e-012) | ● | ○ | ● | ● | ○ | ○ | ● | ○ | ● |
| -0.0174* (8.287566e-003)   | -0.0123 (6.132110e-002)    | ● | ○ | ● | ● | ○ | ○ | ○ | ● | ● |
| 0.0011 (8.663580e-001)     | -0.0266*** (5.158055e-005) | ● | ○ | ○ | ● | ● | ○ | ● | ● | ○ |
| -0.0483*** (2.217115e-013) | -0.0431*** (5.872880e-011) | ● | ○ | ○ | ● | ● | ○ | ● | ○ | ● |
| -0.0221** (7.672076e-004)  | -0.0173* (8.737930e-003)   | ● | ○ | ○ | ● | ● | ○ | ○ | ● | ● |
| -0.0289*** (1.115662e-005) | -0.0235** (3.661907e-004)  | ● | ○ | ○ | ● | ○ | ○ | ● | ● | ● |
| -0.0483*** (2.096101e-013) | -0.0566*** (0)             | ○ | ● | ● | ● | ● | ○ | ● | ○ | ○ |
| 0.0149 (2.354959e-002)     | -0.0315*** (1.736331e-006) | ○ | ● | ● | ● | ● | ○ | ○ | ● | ○ |
| -0.0636*** (0)             | -0.0584*** (0)             | ○ | ● | ● | ● | ● | ○ | ○ | ○ | ● |
| 0.0017 (7.959467e-001)     | -0.0365*** (2.974876e-008) | ○ | ● | ● | ● | ○ | ○ | ● | ● | ○ |

|                            |                            |   |   |   |   |   |   |   |   |   |
|----------------------------|----------------------------|---|---|---|---|---|---|---|---|---|
| -0.0620*** (0)             | -0.0569*** (0)             | ○ | ● | ● | ● | ○ | ○ | ● | ○ | ● |
| -0.0282*** (1.821035e-005) | -0.0229** (5.046901e-004)  | ○ | ● | ● | ● | ○ | ○ | ○ | ● | ● |
| -0.0014 (8.314947e-001)    | -0.0269*** (4.426487e-005) | ○ | ● | ○ | ● | ● | ○ | ● | ● | ○ |
| -0.0590*** (0)             | -0.0536*** (3.330669e-016) | ○ | ● | ○ | ● | ● | ○ | ● | ○ | ● |
| -0.0313*** (1.908092e-006) | -0.0261*** (7.380151e-005) | ○ | ● | ○ | ● | ● | ○ | ○ | ● | ● |
| -0.0368*** (2.323183e-008) | -0.0311*** (2.233707e-006) | ○ | ● | ○ | ● | ○ | ○ | ● | ● | ● |
| -0.0042 (5.207283e-001)    | -0.0293*** (8.645598e-006) | ○ | ○ | ● | ● | ● | ○ | ● | ● | ○ |
| -0.0632*** (0)             | -0.0580*** (0)             | ○ | ○ | ● | ● | ● | ○ | ● | ○ | ● |
| -0.0363*** (3.326436e-008) | -0.0308*** (2.887685e-006) | ○ | ○ | ● | ● | ● | ○ | ○ | ● | ● |
| -0.0390*** (3.102354e-009) | -0.0332*** (4.396624e-007) | ○ | ○ | ● | ● | ○ | ○ | ● | ● | ● |
| -0.0333*** (4.254955e-007) | -0.0273*** (3.357250e-005) | ○ | ○ | ○ | ● | ● | ○ | ● | ● | ● |
| -0.0376*** (1.073291e-008) | -0.0499*** (3.275158e-014) | ● | ● | ● | ● | ● | ○ | ● | ○ | ○ |
| 0.0056 (3.949910e-001)     | -0.0378*** (9.138643e-009) | ● | ● | ● | ● | ● | ○ | ○ | ● | ○ |
| -0.0516*** (4.218847e-015) | -0.0467*** (1.246891e-012) | ● | ● | ● | ● | ● | ○ | ○ | ○ | ● |
| -0.0025 (7.037890e-001)    | -0.0396*** (1.756284e-009) | ● | ● | ● | ● | ○ | ○ | ● | ● | ○ |
| -0.0511*** (8.437695e-015) | -0.0463*** (1.997957e-012) | ● | ● | ● | ● | ○ | ○ | ● | ○ | ● |
| -0.0248** (1.681744e-004)  | -0.0194* (3.152518e-003)   | ● | ● | ● | ● | ○ | ○ | ○ | ● | ● |
| -0.0031 (6.429819e-001)    | -0.0284*** (1.648349e-005) | ● | ● | ○ | ● | ● | ○ | ● | ● | ○ |
| -0.0492*** (7.582823e-014) | -0.0439*** (2.420208e-011) | ● | ● | ○ | ● | ● | ○ | ● | ○ | ● |
| -0.0271*** (3.954771e-005) | -0.0218** (9.357775e-004)  | ● | ● | ○ | ● | ● | ○ | ○ | ● | ● |
| -0.0307*** (3.198966e-006) | -0.0251** (1.397952e-004)  | ● | ● | ○ | ● | ○ | ○ | ● | ● | ● |
| 0.0011 (8.636389e-001)     | -0.0265*** (5.719229e-005) | ● | ○ | ● | ● | ● | ○ | ● | ● | ○ |
| -0.0485*** (1.647571e-013) | -0.0437*** (3.030720e-011) | ● | ○ | ● | ● | ● | ○ | ● | ○ | ● |
| -0.0219** (8.641822e-004)  | -0.0168 (1.054101e-002)    | ● | ○ | ● | ● | ● | ○ | ○ | ● | ● |
| -0.0289*** (1.137345e-005) | -0.0234** (3.772934e-004)  | ● | ○ | ● | ● | ○ | ○ | ● | ● | ● |
| -0.0222** (7.449442e-004)  | -0.0164 (1.279633e-002)    | ● | ○ | ○ | ● | ● | ○ | ● | ● | ● |
| -0.0015 (8.165377e-001)    | -0.0270*** (3.980764e-005) | ○ | ● | ● | ● | ● | ○ | ● | ● | ○ |
| -0.0608*** (0)             | -0.0557*** (0)             | ○ | ● | ● | ● | ● | ○ | ● | ○ | ● |
| -0.0309*** (2.630127e-006) | -0.0256** (1.008305e-004)  | ○ | ● | ● | ● | ● | ○ | ○ | ● | ● |
| -0.0367*** (2.496203e-008) | -0.0310*** (2.399961e-006) | ○ | ● | ● | ● | ○ | ○ | ● | ● | ● |
| -0.0297*** (6.258532e-006) | -0.0238** (3.060795e-004)  | ○ | ● | ○ | ● | ● | ○ | ● | ● | ● |
| -0.0321*** (1.044195e-006) | -0.0260*** (7.699792e-005) | ○ | ○ | ● | ● | ● | ○ | ● | ● | ● |
| -0.0031 (6.409233e-001)    | -0.0284*** (1.599421e-005) | ● | ● | ● | ● | ● | ○ | ● | ● | ○ |



|                                                        |                                                   |    |    |    |    |       |       |        |        |           |
|--------------------------------------------------------|---------------------------------------------------|----|----|----|----|-------|-------|--------|--------|-----------|
| -0.0499*** (3.386180e-014)                             | -0.0450*** (7.682188e-012)                        | ●  | ●  | ●  | ●  | ●     | ○     | ●      | ○      | ●         |
| -0.0269*** (4.228621e-005)                             | -0.0216* (1.013987e-003)                          | ●  | ●  | ●  | ●  | ●     | ○     | ○      | ●      | ●         |
| -0.0307*** (3.080708e-006)                             | -0.0251** (1.332428e-004)                         | ●  | ●  | ●  | ●  | ○     | ○     | ●      | ●      | ●         |
| -0.0241** (2.433125e-004)                              | -0.0182* (5.698801e-003)                          | ●  | ●  | ○  | ●  | ●     | ○     | ●      | ●      | ●         |
| -0.0222** (7.631436e-004)                              | -0.0163 (1.326144e-002)                           | ●  | ○  | ●  | ●  | ●     | ○     | ●      | ●      | ●         |
| -0.0296*** (6.753615e-006)                             | -0.0236** (3.295283e-004)                         | ○  | ●  | ●  | ●  | ●     | ○     | ●      | ●      | ●         |
| -0.0242** (2.382187e-004)                              | -0.0183* (5.557461e-003)                          | ●  | ●  | ●  | ●  | ●     | ○     | ●      | ●      | ●         |
| -0.0266*** (5.412254e-005)                             | -0.0128 (5.116761e-002)                           | ●  | ●  | ●  | ●  | ●     | ○     | ●      | ●      | ●         |
| <b><math>FD_n</math> and <math>\theta_{neu}</math></b> | <b><math>FD_n</math> and <math>P_{neu}</math></b> |    |    |    |    |       |       |        |        |           |
| Watson $\theta_{neu}$                                  | Watson $P_{neu}$                                  | RR | GC | RD | SC | $D_n$ | $D_x$ | $FD_n$ | $FD_x$ | $d_{neu}$ |
| -0.1935*** (0)                                         | -0.0781*** (0)                                    | ○  | ○  | ○  | ●  | ○     | ○     | ○      | ○      | ○         |
| -0.2236*** (0)                                         | -0.0923*** (0)                                    | ●  | ○  | ○  | ●  | ○     | ○     | ○      | ○      | ○         |
| -0.2051*** (0)                                         | -0.1009*** (0)                                    | ○  | ●  | ○  | ●  | ○     | ○     | ○      | ○      | ○         |
| -0.2088*** (0)                                         | -0.0960*** (0)                                    | ○  | ○  | ●  | ●  | ○     | ○     | ○      | ○      | ○         |
| -0.1323*** (0)                                         | -0.0109 (9.776066e-002)                           | ○  | ○  | ○  | ●  | ●     | ○     | ○      | ○      | ○         |
| -0.1799*** (0)                                         | -0.0638*** (0)                                    | ○  | ○  | ○  | ●  | ○     | ●     | ○      | ○      | ○         |
| -0.0414*** (3.159792e-010)                             | -0.0053 (4.201675e-001)                           | ○  | ○  | ○  | ●  | ○     | ○     | ○      | ●      | ○         |
| -0.0880*** (0)                                         | -0.0855*** (0)                                    | ○  | ○  | ○  | ●  | ○     | ○     | ○      | ○      | ●         |
| -0.1393*** (0)                                         | -0.0567*** (0)                                    | ●  | ●  | ○  | ●  | ○     | ○     | ○      | ○      | ○         |
| -0.2143*** (0)                                         | -0.0945*** (0)                                    | ●  | ○  | ●  | ●  | ○     | ○     | ○      | ○      | ○         |
| -0.1307*** (0)                                         | -0.0054 (4.138431e-001)                           | ●  | ○  | ○  | ●  | ●     | ○     | ○      | ○      | ○         |
| -0.2118*** (0)                                         | -0.0793*** (0)                                    | ●  | ○  | ○  | ●  | ○     | ●     | ○      | ○      | ○         |
| -0.0774*** (0)                                         | -0.0262*** (6.864408e-005)                        | ●  | ○  | ○  | ●  | ○     | ○     | ○      | ●      | ○         |
| -0.1313*** (0)                                         | -0.1272*** (0)                                    | ●  | ○  | ○  | ●  | ○     | ○     | ○      | ○      | ●         |
| -0.2112*** (0)                                         | -0.1071*** (0)                                    | ○  | ●  | ●  | ●  | ○     | ○     | ○      | ○      | ○         |
| -0.1483*** (0)                                         | -0.0287*** (1.281598e-005)                        | ○  | ●  | ○  | ●  | ●     | ○     | ○      | ○      | ○         |
| -0.1927*** (0)                                         | -0.0875*** (0)                                    | ○  | ●  | ○  | ●  | ○     | ●     | ○      | ○      | ○         |
| -0.0661*** (0)                                         | -0.0280*** (2.116490e-005)                        | ○  | ●  | ○  | ●  | ○     | ○     | ○      | ●      | ○         |
| -0.1104*** (0)                                         | -0.1079*** (0)                                    | ○  | ●  | ○  | ●  | ○     | ○     | ○      | ○      | ●         |
| -0.1432*** (0)                                         | -0.0216* (1.019326e-003)                          | ○  | ○  | ●  | ●  | ●     | ○     | ○      | ○      | ○         |
| -0.1958*** (0)                                         | -0.0822*** (0)                                    | ○  | ○  | ●  | ●  | ○     | ●     | ○      | ○      | ○         |
| -0.0528*** (9.992007e-016)                             | -0.0154 (1.952601e-002)                           | ○  | ○  | ●  | ●  | ○     | ○     | ○      | ●      | ○         |
| -0.1040*** (0)                                         | -0.1039*** (0)                                    | ○  | ○  | ●  | ●  | ○     | ○     | ○      | ○      | ●         |

|                            |                            |   |   |   |   |   |   |   |   |   |
|----------------------------|----------------------------|---|---|---|---|---|---|---|---|---|
| -0.1296*** (0)             | -0.0077 (2.432916e-001)    | ○ | ○ | ○ | ● | ● | ● | ○ | ○ | ○ |
| -0.0390*** (3.082556e-009) | 0.0340*** (2.291219e-007)  | ○ | ○ | ○ | ● | ● | ○ | ○ | ● | ○ |
| -0.0226** (5.924553e-004)  | -0.0202* (2.188146e-003)   | ○ | ○ | ○ | ● | ● | ○ | ○ | ○ | ● |
| -0.0404*** (7.905960e-010) | -0.0150 (2.285898e-002)    | ○ | ○ | ○ | ● | ○ | ● | ○ | ● | ○ |
| -0.0727*** (0)             | -0.0713*** (0)             | ○ | ○ | ○ | ● | ○ | ● | ○ | ○ | ● |
| -0.0105 (1.098125e-001)    | -0.0095 (1.489428e-001)    | ○ | ○ | ○ | ● | ○ | ○ | ○ | ● | ● |
| -0.1397*** (0)             | -0.0602*** (0)             | ● | ● | ● | ● | ○ | ○ | ○ | ○ | ○ |
| -0.0954*** (0)             | 0.0070 (2.849846e-001)     | ● | ● | ○ | ● | ● | ○ | ○ | ○ | ○ |
| -0.1301*** (0)             | -0.0457*** (3.654299e-012) | ● | ● | ○ | ● | ○ | ● | ○ | ○ | ○ |
| -0.0420*** (1.731276e-010) | -0.0123 (6.186619e-002)    | ● | ● | ○ | ● | ○ | ○ | ○ | ● | ○ |
| -0.0853*** (0)             | -0.0835*** (0)             | ● | ● | ○ | ● | ○ | ○ | ○ | ○ | ● |
| -0.1287*** (0)             | -0.0085 (1.956931e-001)    | ● | ○ | ● | ● | ● | ○ | ○ | ○ | ○ |
| -0.2040*** (0)             | -0.0825*** (0)             | ● | ○ | ● | ● | ○ | ● | ○ | ○ | ○ |
| -0.0773*** (0)             | -0.0287*** (1.328959e-005) | ● | ○ | ● | ● | ○ | ○ | ○ | ● | ○ |
| -0.1288*** (0)             | -0.1274*** (0)             | ● | ○ | ● | ● | ○ | ○ | ○ | ○ | ● |
| -0.1288*** (0)             | -0.0027 (6.773881e-001)    | ● | ○ | ○ | ● | ● | ● | ○ | ○ | ○ |
| -0.0493*** (7.038814e-014) | 0.0298*** (6.094484e-006)  | ● | ○ | ○ | ● | ● | ○ | ○ | ● | ○ |
| -0.0445*** (1.352940e-011) | -0.0412*** (3.678571e-010) | ● | ○ | ○ | ● | ● | ○ | ○ | ○ | ● |
| -0.0745*** (0)             | -0.0348*** (1.194868e-007) | ● | ○ | ○ | ● | ○ | ● | ○ | ● | ○ |
| -0.1174*** (0)             | -0.1145*** (0)             | ● | ○ | ○ | ● | ○ | ● | ○ | ○ | ● |
| -0.0450*** (7.788992e-012) | -0.0428*** (7.778145e-011) | ● | ○ | ○ | ● | ○ | ○ | ○ | ● | ● |
| -0.1526*** (0)             | -0.0328*** (6.294174e-007) | ○ | ● | ● | ● | ● | ○ | ○ | ○ | ○ |
| -0.1987*** (0)             | -0.0936*** (0)             | ○ | ● | ● | ● | ○ | ● | ○ | ○ | ○ |
| -0.0683*** (0)             | -0.0298*** (5.781531e-006) | ○ | ● | ● | ● | ○ | ○ | ○ | ● | ○ |
| -0.1160*** (0)             | -0.1146*** (0)             | ○ | ● | ● | ● | ○ | ○ | ○ | ○ | ● |
| -0.1452*** (0)             | -0.0251** (1.353067e-004)  | ○ | ● | ○ | ● | ● | ● | ○ | ○ | ○ |
| -0.0542*** (1.110223e-016) | 0.0197* (2.800023e-003)    | ○ | ● | ○ | ● | ● | ○ | ○ | ● | ○ |
| -0.0404*** (8.338269e-010) | -0.0378*** (8.818483e-009) | ○ | ● | ○ | ● | ● | ○ | ○ | ○ | ● |
| -0.0640*** (0)             | -0.0354*** (7.745422e-008) | ○ | ● | ○ | ● | ○ | ● | ○ | ● | ○ |
| -0.0959*** (0)             | -0.0945*** (0)             | ○ | ● | ○ | ● | ○ | ● | ○ | ○ | ● |
| -0.0339*** (2.514702e-007) | -0.0327*** (6.593281e-007) | ○ | ● | ○ | ● | ○ | ○ | ○ | ● | ● |
| -0.1405*** (0)             | -0.0185* (4.883318e-003)   | ○ | ○ | ● | ● | ● | ● | ○ | ○ | ○ |
| -0.0451*** (7.441159e-012) | 0.0288*** (1.201840e-005)  | ○ | ○ | ● | ● | ● | ○ | ○ | ● | ○ |

|                            |                            |   |   |   |   |   |   |   |   |   |
|----------------------------|----------------------------|---|---|---|---|---|---|---|---|---|
| -0.0330*** (5.215428e-007) | -0.0318*** (1.315214e-006) | ○ | ○ | ● | ● | ● | ○ | ○ | ○ | ● |
| -0.0513*** (5.995204e-015) | -0.0245** (1.994942e-004)  | ○ | ○ | ● | ● | ○ | ● | ○ | ● | ○ |
| -0.0892*** (0)             | -0.0901*** (0)             | ○ | ○ | ● | ● | ○ | ● | ○ | ○ | ● |
| -0.0203* (1.997783e-003)   | -0.0204* (1.950335e-003)   | ○ | ○ | ● | ● | ○ | ○ | ○ | ● | ● |
| -0.0387*** (4.065688e-009) | 0.0230** (4.739386e-004)   | ○ | ○ | ○ | ● | ● | ● | ○ | ● | ○ |
| -0.0188* (4.352498e-003)   | -0.0167 (1.140233e-002)    | ○ | ○ | ○ | ● | ● | ● | ○ | ○ | ● |
| 0.0249** (1.513886e-004)   | 0.0265*** (5.545702e-005)  | ○ | ○ | ○ | ● | ● | ○ | ○ | ● | ● |
| -0.0199* (2.450836e-003)   | -0.0176* (7.592026e-003)   | ○ | ○ | ○ | ● | ○ | ● | ○ | ● | ● |
| -0.0962*** (0)             | 0.0044 (5.085925e-001)     | ● | ● | ● | ● | ● | ○ | ○ | ○ | ○ |
| -0.1308*** (0)             | -0.0494*** (5.639933e-014) | ● | ● | ● | ● | ○ | ● | ○ | ○ | ○ |
| -0.0428*** (7.963252e-011) | -0.0136 (3.859460e-002)    | ● | ● | ● | ● | ○ | ○ | ○ | ● | ○ |
| -0.0868*** (0)             | -0.0864*** (0)             | ● | ● | ● | ● | ○ | ○ | ○ | ○ | ● |
| -0.0931*** (0)             | 0.0099 (1.323080e-001)     | ● | ● | ○ | ● | ● | ● | ○ | ○ | ○ |
| -0.0284*** (1.581379e-005) | 0.0370*** (1.911242e-008)  | ● | ● | ○ | ● | ● | ○ | ○ | ● | ○ |
| -0.0275*** (2.943987e-005) | -0.0253** (1.192789e-004)  | ● | ● | ○ | ● | ● | ○ | ○ | ○ | ● |
| -0.0415*** (2.822301e-010) | -0.0207* (1.619575e-003)   | ● | ● | ○ | ● | ○ | ● | ○ | ● | ○ |
| -0.0736*** (0)             | -0.0729*** (0)             | ● | ● | ○ | ● | ○ | ● | ○ | ○ | ● |
| -0.0237** (3.249916e-004)  | -0.0228** (5.417477e-004)  | ● | ● | ○ | ● | ○ | ○ | ○ | ● | ● |
| -0.1270*** (0)             | -0.0061 (3.511800e-001)    | ● | ○ | ● | ● | ● | ● | ○ | ○ | ○ |
| -0.0494*** (6.172840e-014) | 0.0282*** (1.872341e-005)  | ● | ○ | ● | ● | ● | ○ | ○ | ● | ○ |
| -0.0449*** (8.630985e-012) | -0.0431*** (5.564360e-011) | ● | ○ | ● | ● | ● | ○ | ○ | ○ | ● |
| -0.0745*** (0)             | -0.0371*** (1.674496e-008) | ● | ○ | ● | ● | ○ | ● | ○ | ● | ○ |
| -0.1160*** (0)             | -0.1156*** (0)             | ● | ○ | ● | ● | ○ | ● | ○ | ○ | ● |
| -0.0459*** (3.106293e-012) | -0.0447*** (1.058842e-011) | ● | ○ | ● | ● | ○ | ○ | ○ | ● | ● |
| -0.0465*** (1.615486e-012) | 0.0200* (2.349320e-003)    | ● | ○ | ○ | ● | ● | ● | ○ | ● | ○ |
| -0.0412*** (3.803508e-010) | -0.0383*** (5.949674e-009) | ● | ○ | ○ | ● | ● | ● | ○ | ○ | ● |
| 0.0031 (6.383806e-001)     | 0.0054 (4.084116e-001)     | ● | ○ | ○ | ● | ● | ○ | ○ | ● | ● |
| -0.0505*** (1.554312e-014) | -0.0471*** (8.107959e-013) | ● | ○ | ○ | ● | ○ | ● | ○ | ● | ● |
| -0.1496*** (0)             | -0.0292*** (9.144191e-006) | ○ | ● | ● | ● | ● | ● | ○ | ○ | ○ |
| -0.0551*** (0)             | 0.0190* (3.814409e-003)    | ○ | ● | ● | ● | ● | ○ | ○ | ● | ○ |
| -0.0445*** (1.296530e-011) | -0.0427*** (8.638967e-011) | ○ | ● | ● | ● | ● | ○ | ○ | ○ | ● |
| -0.0662*** (0)             | -0.0372*** (1.528546e-008) | ○ | ● | ● | ● | ○ | ● | ○ | ● | ○ |
| -0.1015*** (0)             | -0.1011*** (0)             | ○ | ● | ● | ● | ○ | ● | ○ | ○ | ● |

|                            |                            |   |   |   |   |   |   |   |   |   |
|----------------------------|----------------------------|---|---|---|---|---|---|---|---|---|
| -0.0359*** (4.735971e-008) | -0.0350*** (1.018141e-007) | ○ | ● | ● | ● | ○ | ○ | ○ | ● | ● |
| -0.0522*** (2.109424e-015) | 0.0108 (1.003835e-001)     | ○ | ● | ○ | ● | ● | ● | ○ | ● | ○ |
| -0.0361*** (3.963196e-008) | -0.0340*** (2.423577e-007) | ○ | ● | ○ | ● | ● | ● | ○ | ○ | ● |
| 0.0100 (1.278130e-001)     | 0.0117 (7.471089e-002)     | ○ | ● | ○ | ● | ● | ○ | ○ | ● | ● |
| -0.0410*** (4.765931e-010) | -0.0386*** (4.493879e-009) | ○ | ● | ○ | ● | ○ | ● | ○ | ● | ● |
| -0.0441*** (1.939859e-011) | 0.0183* (5.364198e-003)    | ○ | ○ | ● | ● | ● | ● | ○ | ● | ○ |
| -0.0293*** (8.268672e-006) | -0.0284*** (1.543117e-005) | ○ | ○ | ● | ● | ● | ● | ○ | ○ | ● |
| 0.0192* (3.477254e-003)    | 0.0202* (2.109571e-003)    | ○ | ○ | ● | ● | ● | ○ | ○ | ● | ● |
| -0.0291*** (9.976708e-006) | -0.0277*** (2.497326e-005) | ○ | ○ | ● | ● | ○ | ● | ○ | ● | ● |
| 0.0141 (3.259487e-002)     | 0.0173* (8.393551e-003)    | ○ | ○ | ○ | ● | ● | ● | ○ | ● | ● |
| -0.0941*** (0)             | 0.0071 (2.815810e-001)     | ● | ● | ● | ● | ● | ● | ○ | ○ | ○ |
| -0.0289*** (1.147693e-005) | 0.0362*** (3.727909e-008)  | ● | ● | ● | ● | ● | ○ | ○ | ● | ○ |
| -0.0289*** (1.157567e-005) | -0.0276*** (2.734775e-005) | ● | ● | ● | ● | ● | ○ | ○ | ○ | ● |
| -0.0423*** (1.324859e-010) | -0.0221** (8.074637e-004)  | ● | ● | ● | ● | ○ | ● | ○ | ● | ○ |
| -0.0754*** (0)             | -0.0759*** (0)             | ● | ● | ● | ● | ○ | ● | ○ | ○ | ● |
| -0.0245** (1.955387e-004)  | -0.0241** (2.578278e-004)  | ● | ● | ● | ● | ○ | ○ | ○ | ● | ● |
| -0.0280*** (2.033966e-005) | 0.0270*** (4.155628e-005)  | ● | ● | ○ | ● | ● | ● | ○ | ● | ○ |
| -0.0241** (2.532974e-004)  | -0.0223** (7.165957e-004)  | ● | ● | ○ | ● | ● | ● | ○ | ○ | ● |
| 0.0138 (3.548500e-002)     | 0.0154 (1.898969e-002)     | ● | ● | ○ | ● | ● | ○ | ○ | ● | ● |
| -0.0297*** (6.594587e-006) | -0.0276*** (2.758187e-005) | ● | ● | ○ | ● | ○ | ● | ○ | ● | ● |
| -0.0466*** (1.423417e-012) | 0.0186* (4.757621e-003)    | ● | ○ | ● | ● | ● | ● | ○ | ● | ○ |
| -0.0419*** (1.914262e-010) | -0.0404*** (8.298146e-010) | ● | ○ | ● | ● | ● | ● | ○ | ○ | ● |
| 0.0025 (7.064700e-001)     | 0.0042 (5.187732e-001)     | ● | ○ | ● | ● | ● | ○ | ○ | ● | ● |
| -0.0513*** (5.995204e-015) | -0.0489*** (1.005862e-013) | ● | ○ | ● | ● | ○ | ● | ○ | ● | ● |
| -0.0035 (5.993108e-001)    | 0.0005 (9.429744e-001)     | ● | ○ | ○ | ● | ● | ● | ○ | ● | ● |
| -0.0531*** (6.661338e-016) | 0.0102 (1.225383e-001)     | ○ | ● | ● | ● | ● | ● | ○ | ● | ○ |
| -0.0403*** (8.724362e-010) | -0.0388*** (3.570962e-009) | ○ | ● | ● | ● | ● | ● | ○ | ○ | ● |
| 0.0089 (1.787638e-001)     | 0.0104 (1.143547e-001)     | ○ | ● | ● | ● | ● | ○ | ○ | ● | ● |
| -0.0429*** (7.003831e-011) | -0.0408*** (5.517281e-010) | ○ | ● | ● | ● | ○ | ● | ○ | ● | ● |
| 0.0013 (8.380366e-001)     | 0.0046 (4.799739e-001)     | ○ | ● | ○ | ● | ● | ● | ○ | ● | ● |
| 0.0090 (1.706599e-001)     | 0.0118 (7.395215e-002)     | ○ | ○ | ● | ● | ● | ● | ○ | ● | ● |
| -0.0285*** (1.496840e-005) | 0.0262*** (6.730955e-005)  | ● | ● | ● | ● | ● | ● | ○ | ● | ○ |
| -0.0256** (1.005141e-004)  | -0.0247** (1.799813e-004)  | ● | ● | ● | ● | ● | ● | ○ | ○ | ● |

|                                                        |                                                   |    |    |    |    |       |       |        |        |           |
|--------------------------------------------------------|---------------------------------------------------|----|----|----|----|-------|-------|--------|--------|-----------|
| 0.0134 (4.248445e-002)                                 | 0.0147 (2.529325e-002)                            | ●  | ●  | ●  | ●  | ●     | ○     | ○      | ●      | ●         |
| -0.0305*** (3.571359e-006)                             | -0.0289*** (1.157296e-005)                        | ●  | ●  | ●  | ●  | ○     | ●     | ○      | ●      | ●         |
| 0.0066 (3.191892e-001)                                 | 0.0098 (1.384279e-001)                            | ●  | ●  | ○  | ●  | ●     | ●     | ○      | ●      | ●         |
| -0.0040 (5.413504e-001)                                | -0.0006 (9.227972e-001)                           | ●  | ○  | ●  | ●  | ●     | ●     | ○      | ●      | ●         |
| 0.0003 (9.695487e-001)                                 | 0.0034 (6.053117e-001)                            | ○  | ●  | ●  | ●  | ●     | ●     | ○      | ●      | ●         |
| 0.0061 (3.556625e-001)                                 | 0.0091 (1.691375e-001)                            | ●  | ●  | ●  | ●  | ●     | ●     | ○      | ●      | ●         |
| 0.0223** (7.155404e-004)                               | 0.0070 (2.860453e-001)                            | ●  | ●  | ●  | ●  | ●     | ●     | ○      | ●      | ●         |
| <b><math>FD_x</math> and <math>\theta_{neu}</math></b> | <b><math>FD_x</math> and <math>P_{neu}</math></b> |    |    |    |    |       |       |        |        |           |
| Watson $\theta_{neu}$                                  | Watson $P_{neu}$                                  | RR | GC | RD | SC | $D_n$ | $D_x$ | $FD_n$ | $FD_x$ | $d_{neu}$ |
| -0.2124*** (0)                                         | -0.0941*** (0)                                    | ○  | ○  | ○  | ●  | ○     | ○     | ○      | ○      | ○         |
| -0.2233*** (0)                                         | -0.0960*** (0)                                    | ●  | ○  | ○  | ●  | ○     | ○     | ○      | ○      | ○         |
| -0.2172*** (0)                                         | -0.1103*** (0)                                    | ○  | ●  | ○  | ●  | ○     | ○     | ○      | ○      | ○         |
| -0.2264*** (0)                                         | -0.1109*** (0)                                    | ○  | ○  | ●  | ●  | ○     | ○     | ○      | ○      | ○         |
| -0.1553*** (0)                                         | -0.0543*** (1.110223e-016)                        | ○  | ○  | ○  | ●  | ●     | ○     | ○      | ○      | ○         |
| -0.1951*** (0)                                         | -0.0685*** (0)                                    | ○  | ○  | ○  | ●  | ○     | ●     | ○      | ○      | ○         |
| -0.0983*** (0)                                         | -0.0529*** (8.881784e-016)                        | ○  | ○  | ○  | ●  | ○     | ○     | ●      | ○      | ○         |
| -0.1053*** (0)                                         | -0.1029*** (0)                                    | ○  | ○  | ○  | ●  | ○     | ○     | ○      | ○      | ●         |
| -0.1515*** (0)                                         | -0.0659*** (0)                                    | ●  | ●  | ○  | ●  | ○     | ○     | ○      | ○      | ○         |
| -0.2141*** (0)                                         | -0.0982*** (0)                                    | ●  | ○  | ●  | ●  | ○     | ○     | ○      | ○      | ○         |
| -0.1415*** (0)                                         | -0.0412*** (3.648929e-010)                        | ●  | ○  | ○  | ●  | ●     | ○     | ○      | ○      | ○         |
| -0.2100*** (0)                                         | -0.0730*** (0)                                    | ●  | ○  | ○  | ●  | ○     | ●     | ○      | ○      | ○         |
| -0.0766*** (0)                                         | -0.0373*** (1.409639e-008)                        | ●  | ○  | ○  | ●  | ○     | ○     | ●      | ○      | ○         |
| -0.1336*** (0)                                         | -0.1301*** (0)                                    | ●  | ○  | ○  | ●  | ○     | ○     | ○      | ○      | ●         |
| -0.2243*** (0)                                         | -0.1174*** (0)                                    | ○  | ●  | ●  | ●  | ○     | ○     | ○      | ○      | ○         |
| -0.1651*** (0)                                         | -0.0668*** (0)                                    | ○  | ●  | ○  | ●  | ●     | ○     | ○      | ○      | ○         |
| -0.2019*** (0)                                         | -0.0857*** (0)                                    | ○  | ●  | ○  | ●  | ○     | ●     | ○      | ○      | ○         |
| -0.0985*** (0)                                         | -0.0529*** (8.881784e-016)                        | ○  | ●  | ○  | ●  | ○     | ○     | ●      | ○      | ○         |
| -0.1205*** (0)                                         | -0.1182*** (0)                                    | ○  | ●  | ○  | ●  | ○     | ○     | ○      | ○      | ●         |
| -0.1663*** (0)                                         | -0.0654*** (0)                                    | ○  | ○  | ●  | ●  | ●     | ○     | ○      | ○      | ○         |
| -0.2097*** (0)                                         | -0.0854*** (0)                                    | ○  | ○  | ●  | ●  | ○     | ●     | ○      | ○      | ○         |
| -0.1040*** (0)                                         | -0.0578*** (0)                                    | ○  | ○  | ●  | ●  | ○     | ○     | ●      | ○      | ○         |
| -0.1203*** (0)                                         | -0.1200*** (0)                                    | ○  | ○  | ●  | ●  | ○     | ○     | ○      | ○      | ●         |
| -0.1452*** (0)                                         | -0.0340*** (2.414689e-007)                        | ○  | ○  | ○  | ●  | ●     | ●     | ○      | ○      | ○         |

|                            |                            |   |   |   |   |   |   |   |   |   |
|----------------------------|----------------------------|---|---|---|---|---|---|---|---|---|
| -0.0907*** (0)             | -0.0631*** (0)             | ○ | ○ | ○ | ● | ● | ○ | ● | ○ | ○ |
| -0.0656*** (0)             | -0.0637*** (0)             | ○ | ○ | ○ | ● | ● | ○ | ○ | ○ | ● |
| -0.0868*** (0)             | -0.0292*** (8.886206e-006) | ○ | ○ | ○ | ● | ○ | ● | ● | ○ | ○ |
| -0.0774*** (0)             | -0.0776*** (0)             | ○ | ○ | ○ | ● | ○ | ● | ○ | ○ | ● |
| -0.0590*** (0)             | -0.0582*** (0)             | ○ | ○ | ○ | ● | ○ | ○ | ● | ○ | ● |
| -0.1522*** (0)             | -0.0700*** (0)             | ● | ● | ● | ● | ○ | ○ | ○ | ○ | ○ |
| -0.1148*** (0)             | -0.0332*** (4.642993e-007) | ● | ● | ○ | ● | ● | ○ | ○ | ○ | ○ |
| -0.1387*** (0)             | -0.0430*** (6.228418e-011) | ● | ● | ○ | ● | ○ | ● | ○ | ○ | ○ |
| -0.0732*** (0)             | -0.0358*** (5.105222e-008) | ● | ● | ○ | ● | ○ | ○ | ● | ○ | ○ |
| -0.0958*** (0)             | -0.0942*** (0)             | ● | ● | ○ | ● | ○ | ○ | ○ | ○ | ● |
| -0.1396*** (0)             | -0.0451*** (7.201351e-012) | ● | ○ | ● | ● | ● | ○ | ○ | ○ | ○ |
| -0.2021*** (0)             | -0.0759*** (0)             | ● | ○ | ● | ● | ○ | ● | ○ | ○ | ○ |
| -0.0766*** (0)             | -0.0393*** (2.328287e-009) | ● | ○ | ● | ● | ○ | ○ | ● | ○ | ○ |
| -0.1311*** (0)             | -0.1302*** (0)             | ● | ○ | ● | ● | ○ | ○ | ○ | ○ | ● |
| -0.1363*** (0)             | -0.0240** (2.660176e-004)  | ● | ○ | ○ | ● | ● | ● | ○ | ○ | ○ |
| -0.0735*** (0)             | -0.0506*** (1.509903e-014) | ● | ○ | ○ | ● | ● | ○ | ● | ○ | ○ |
| -0.0735*** (0)             | -0.0713*** (0)             | ● | ○ | ○ | ● | ● | ○ | ○ | ○ | ● |
| -0.0689*** (0)             | -0.0160 (1.533679e-002)    | ● | ○ | ○ | ● | ○ | ● | ● | ○ | ○ |
| -0.1107*** (0)             | -0.1098*** (0)             | ● | ○ | ○ | ● | ○ | ● | ○ | ○ | ● |
| -0.0513*** (6.439294e-015) | -0.0507*** (1.310063e-014) | ● | ○ | ○ | ● | ○ | ○ | ● | ○ | ● |
| -0.1712*** (0)             | -0.0726*** (0)             | ○ | ● | ● | ● | ● | ○ | ○ | ○ | ○ |
| -0.2086*** (0)             | -0.0923*** (0)             | ○ | ● | ● | ● | ○ | ● | ○ | ○ | ○ |
| -0.1031*** (0)             | -0.0569*** (0)             | ○ | ● | ● | ● | ○ | ○ | ● | ○ | ○ |
| -0.1271*** (0)             | -0.1259*** (0)             | ○ | ● | ● | ● | ○ | ○ | ○ | ○ | ● |
| -0.1566*** (0)             | -0.0478*** (3.516076e-013) | ○ | ● | ○ | ● | ● | ● | ○ | ○ | ○ |
| -0.0912*** (0)             | -0.0634*** (0)             | ○ | ● | ○ | ● | ● | ○ | ● | ○ | ○ |
| -0.0776*** (0)             | -0.0756*** (0)             | ○ | ● | ○ | ● | ● | ○ | ○ | ○ | ● |
| -0.0885*** (0)             | -0.0305*** (3.549334e-006) | ○ | ● | ○ | ● | ○ | ● | ● | ○ | ○ |
| -0.0936*** (0)             | -0.0939*** (0)             | ○ | ● | ○ | ● | ○ | ● | ○ | ○ | ● |
| -0.0593*** (0)             | -0.0586*** (0)             | ○ | ● | ○ | ● | ○ | ○ | ● | ○ | ● |
| -0.1564*** (0)             | -0.0452*** (6.330714e-012) | ○ | ○ | ● | ● | ● | ● | ○ | ○ | ○ |
| -0.0965*** (0)             | -0.0681*** (0)             | ○ | ○ | ● | ● | ● | ○ | ● | ○ | ○ |
| -0.0763*** (0)             | -0.0757*** (0)             | ○ | ○ | ● | ● | ● | ○ | ○ | ○ | ● |

|                            |                            |   |   |   |   |   |   |   |   |   |
|----------------------------|----------------------------|---|---|---|---|---|---|---|---|---|
| -0.0922*** (0)             | -0.0338*** (2.718598e-007) | ○ | ○ | ● | ● | ○ | ● | ● | ○ | ○ |
| -0.0927*** (0)             | -0.0950*** (0)             | ○ | ○ | ● | ● | ○ | ● | ○ | ○ | ● |
| -0.0640*** (0)             | -0.0638*** (0)             | ○ | ○ | ● | ● | ○ | ○ | ● | ○ | ● |
| -0.0766*** (0)             | -0.0403*** (9.038958e-010) | ○ | ○ | ○ | ● | ● | ● | ● | ○ | ○ |
| -0.0432*** (5.089296e-011) | -0.0437*** (3.189959e-011) | ○ | ○ | ○ | ● | ● | ● | ○ | ○ | ● |
| -0.0665*** (0)             | -0.0660*** (0)             | ○ | ○ | ○ | ● | ● | ○ | ● | ○ | ● |
| -0.0335*** (3.611074e-007) | -0.0354*** (7.300875e-008) | ○ | ○ | ○ | ● | ○ | ● | ● | ○ | ● |
| -0.1162*** (0)             | -0.0369*** (2.118730e-008) | ● | ● | ● | ● | ● | ○ | ○ | ○ | ○ |
| -0.1397*** (0)             | -0.0470*** (8.596457e-013) | ● | ● | ● | ● | ○ | ● | ○ | ○ | ○ |
| -0.0744*** (0)             | -0.0382*** (6.234279e-009) | ● | ● | ● | ● | ○ | ○ | ● | ○ | ○ |
| -0.0977*** (0)             | -0.0977*** (0)             | ● | ● | ● | ● | ○ | ○ | ○ | ○ | ● |
| -0.1069*** (0)             | -0.0145 (2.714445e-002)    | ● | ● | ○ | ● | ● | ● | ○ | ○ | ○ |
| -0.0702*** (0)             | -0.0492*** (7.838175e-014) | ● | ● | ○ | ● | ● | ○ | ● | ○ | ○ |
| -0.0618*** (0)             | -0.0603*** (0)             | ● | ● | ○ | ● | ● | ○ | ○ | ○ | ● |
| -0.0639*** (0)             | -0.0138 (3.629322e-002)    | ● | ● | ○ | ● | ○ | ● | ● | ○ | ○ |
| -0.0737*** (0)             | -0.0746*** (0)             | ● | ● | ○ | ● | ○ | ● | ○ | ○ | ● |
| -0.0499*** (3.419487e-014) | -0.0494*** (6.172840e-014) | ● | ● | ○ | ● | ○ | ○ | ● | ○ | ● |
| -0.1346*** (0)             | -0.0279*** (2.294810e-005) | ● | ○ | ● | ● | ● | ● | ○ | ○ | ○ |
| -0.0735*** (0)             | -0.0525*** (1.554312e-015) | ● | ○ | ● | ● | ● | ○ | ● | ○ | ○ |
| -0.0744*** (0)             | -0.0737*** (0)             | ● | ○ | ● | ● | ● | ○ | ○ | ○ | ● |
| -0.0690*** (0)             | -0.0178* (6.717233e-003)   | ● | ○ | ● | ● | ○ | ● | ● | ○ | ○ |
| -0.1091*** (0)             | -0.1106*** (0)             | ● | ○ | ● | ● | ○ | ● | ○ | ○ | ● |
| -0.0520*** (2.664535e-015) | -0.0523*** (1.887379e-015) | ● | ○ | ● | ● | ○ | ○ | ● | ○ | ● |
| -0.0647*** (0)             | -0.0311*** (2.241084e-006) | ● | ○ | ○ | ● | ● | ● | ● | ○ | ○ |
| -0.0574*** (0)             | -0.0574*** (0)             | ● | ○ | ○ | ● | ● | ● | ○ | ○ | ● |
| -0.0587*** (0)             | -0.0584*** (0)             | ● | ○ | ○ | ● | ● | ○ | ● | ○ | ● |
| -0.0319*** (1.231150e-006) | -0.0339*** (2.507954e-007) | ● | ○ | ○ | ● | ○ | ● | ● | ○ | ● |
| -0.1623*** (0)             | -0.0532*** (5.551115e-016) | ○ | ● | ● | ● | ● | ● | ○ | ○ | ○ |
| -0.0958*** (0)             | -0.0675*** (0)             | ○ | ● | ● | ● | ● | ○ | ● | ○ | ○ |
| -0.0832*** (0)             | -0.0822*** (0)             | ○ | ● | ● | ● | ● | ○ | ○ | ○ | ● |
| -0.0925*** (0)             | -0.0340*** (2.356091e-007) | ○ | ● | ● | ● | ○ | ● | ● | ○ | ○ |
| -0.0999*** (0)             | -0.1013*** (0)             | ○ | ● | ● | ● | ○ | ● | ○ | ○ | ● |
| -0.0633*** (0)             | -0.0632*** (0)             | ○ | ● | ● | ● | ○ | ○ | ● | ○ | ● |

|                            |                            |   |   |   |   |   |   |   |   |   |
|----------------------------|----------------------------|---|---|---|---|---|---|---|---|---|
| -0.0788*** (0)             | -0.0421*** (1.500949e-010) | ○ | ● | ○ | ● | ● | ● | ● | ○ | ○ |
| -0.0566*** (0)             | -0.0571*** (0)             | ○ | ● | ○ | ● | ● | ● | ○ | ○ | ● |
| -0.0670*** (0)             | -0.0666*** (0)             | ○ | ● | ○ | ● | ● | ○ | ● | ○ | ● |
| -0.0353*** (8.072111e-008) | -0.0372*** (1.519601e-008) | ○ | ● | ○ | ● | ○ | ● | ● | ○ | ● |
| -0.0821*** (0)             | -0.0451*** (6.909473e-012) | ○ | ○ | ● | ● | ● | ● | ● | ○ | ○ |
| -0.0541*** (2.220446e-016) | -0.0558*** (0)             | ○ | ○ | ● | ● | ● | ● | ○ | ○ | ● |
| -0.0715*** (0)             | -0.0716*** (0)             | ○ | ○ | ● | ● | ● | ○ | ● | ○ | ● |
| -0.0385*** (4.955137e-009) | -0.0410*** (4.666496e-010) | ○ | ○ | ● | ● | ○ | ● | ● | ○ | ● |
| -0.0414*** (3.153103e-010) | -0.0439*** (2.415557e-011) | ○ | ○ | ○ | ● | ● | ● | ● | ○ | ● |
| -0.1083*** (0)             | -0.0181* (5.967599e-003)   | ● | ● | ● | ● | ● | ● | ○ | ○ | ○ |
| -0.0715*** (0)             | -0.0515*** (5.107026e-015) | ● | ● | ● | ● | ● | ○ | ● | ○ | ○ |
| -0.0639*** (0)             | -0.0636*** (0)             | ● | ● | ● | ● | ● | ○ | ○ | ○ | ● |
| -0.0651*** (0)             | -0.0160 (1.538201e-002)    | ● | ● | ● | ● | ○ | ● | ● | ○ | ○ |
| -0.0757*** (0)             | -0.0780*** (0)             | ● | ● | ● | ● | ○ | ● | ○ | ○ | ● |
| -0.0514*** (5.884182e-015) | -0.0517*** (4.107825e-015) | ● | ● | ● | ● | ○ | ○ | ● | ○ | ● |
| -0.0597*** (0)             | -0.0290*** (1.051654e-005) | ● | ● | ○ | ● | ● | ● | ● | ○ | ○ |
| -0.0443*** (1.679223e-011) | -0.0452*** (6.419865e-012) | ● | ● | ○ | ● | ● | ● | ○ | ○ | ● |
| -0.0571*** (0)             | -0.0569*** (0)             | ● | ● | ○ | ● | ● | ○ | ● | ○ | ● |
| -0.0298*** (5.798786e-006) | -0.0320*** (1.169517e-006) | ● | ● | ○ | ● | ○ | ● | ● | ○ | ● |
| -0.0647*** (0)             | -0.0329*** (5.653553e-007) | ● | ○ | ● | ● | ● | ● | ● | ○ | ○ |
| -0.0584*** (0)             | -0.0599*** (0)             | ● | ○ | ● | ● | ● | ● | ○ | ○ | ● |
| -0.0594*** (0)             | -0.0600*** (0)             | ● | ○ | ● | ● | ● | ○ | ● | ○ | ● |
| -0.0326*** (7.135294e-007) | -0.0354*** (7.381977e-008) | ● | ○ | ● | ● | ○ | ● | ● | ○ | ● |
| -0.0402*** (1.047718e-009) | -0.0428*** (8.005774e-011) | ● | ○ | ○ | ● | ● | ● | ● | ○ | ● |
| -0.0829*** (0)             | -0.0457*** (3.841261e-012) | ○ | ● | ● | ● | ● | ● | ● | ○ | ○ |
| -0.0620*** (0)             | -0.0633*** (0)             | ○ | ● | ● | ● | ● | ● | ○ | ○ | ● |
| -0.0709*** (0)             | -0.0711*** (0)             | ○ | ● | ● | ● | ● | ○ | ● | ○ | ● |
| -0.0389*** (3.284590e-009) | -0.0414*** (3.087270e-010) | ○ | ● | ● | ● | ○ | ● | ● | ○ | ● |
| -0.0436*** (3.425116e-011) | -0.0461*** (2.332579e-012) | ○ | ● | ○ | ● | ● | ● | ● | ○ | ● |
| -0.0463*** (1.864064e-012) | -0.0495*** (5.573320e-014) | ○ | ○ | ● | ● | ● | ● | ● | ○ | ● |
| -0.0609*** (0)             | -0.0311*** (2.349920e-006) | ● | ● | ● | ● | ● | ● | ● | ○ | ○ |
| -0.0463*** (1.953104e-012) | -0.0483*** (2.108314e-013) | ● | ● | ● | ● | ● | ● | ○ | ○ | ● |
| -0.0586*** (0)             | -0.0592*** (0)             | ● | ● | ● | ● | ● | ○ | ● | ○ | ● |



|                            |                            |   |   |   |   |   |   |   |   |   |
|----------------------------|----------------------------|---|---|---|---|---|---|---|---|---|
| -0.0312*** (2.125144e-006) | -0.0340*** (2.302750e-007) | ● | ● | ● | ● | ○ | ● | ● | ○ | ● |
| -0.0378*** (9.620777e-009) | -0.0405*** (7.276389e-010) | ● | ● | ○ | ● | ● | ● | ● | ○ | ● |
| -0.0408*** (5.393536e-010) | -0.0442*** (1.795986e-011) | ● | ○ | ● | ● | ● | ● | ● | ○ | ● |
| -0.0471*** (8.185674e-013) | -0.0502*** (2.431388e-014) | ○ | ● | ● | ● | ● | ● | ● | ○ | ● |
| -0.0391*** (2.892226e-009) | -0.0425*** (1.031711e-010) | ● | ● | ● | ● | ● | ● | ● | ○ | ● |
| -0.0553*** (4.113460e-017) | -0.0433*** (4.453422e-011) | ● | ● | ● | ● | ● | ● | ● | ○ | ● |

\*\*\*  $P < 0.0001$ ; \*\*  $0.0001 \leq P < 0.001$ ; \*  $0.001 \leq P < 0.01$ , Spearman test
