# Supplementary material for: Pervasive Hitchhiking at Coding and Regulatory Sites in Humans
Source: PLOS journal article supplement (doi:10.1371/journal.pgen.1000336), 2009-01-15

Figure S7. Results derived from the sliding windows of 200 kb. Correlations between functional density [i.e. the number of codons ( $FD_n$ ) or the number of conserved noncoding sites ( $FD_x$ )], and divergence [i.e. the divergence at coding sites ( $D_n$ ) or the divergence at conserved noncoding region ( $D_x$ )] and neutral polymorphism [i.e. the level of neutral polymorphism ( $\theta_{neu}$ ) and the level of normalized neutral polymorphism ( $P_{neu}=\theta_{neu}/d_{neu}$ )] are given. The results are based on the Perlegen data.

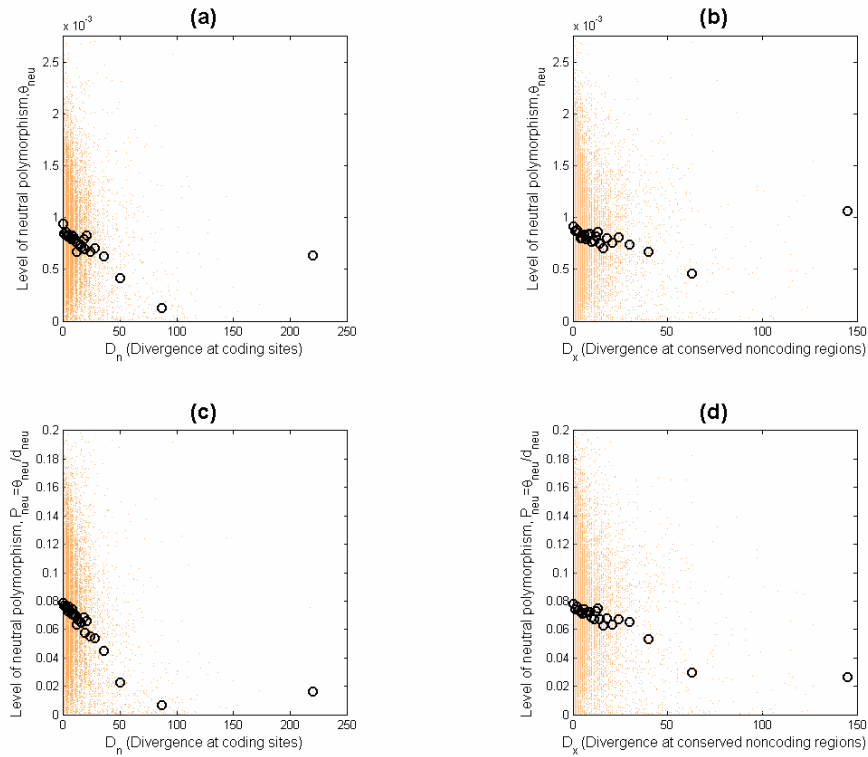

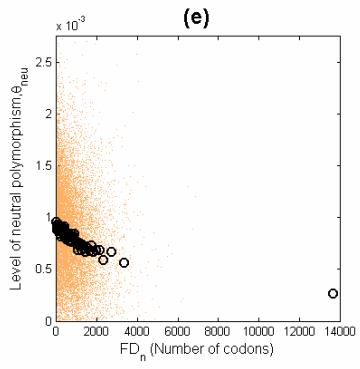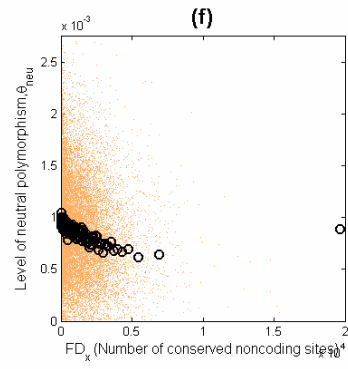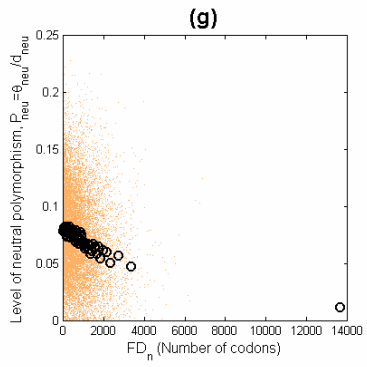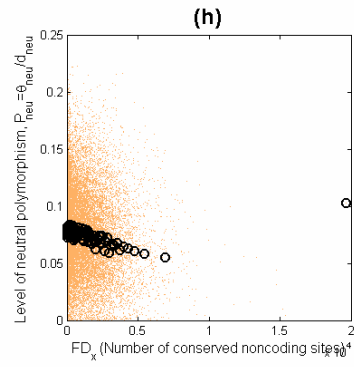

Supplement: S7 (10.1371/journal.pgen.1000336.s007) [file journal.pgen.1000336.s007]
